# Supplementary material
Source: PubMed Central journal article supplement (PMC4909121)
Supplement: NIHMS755501-supplement-supp_tables.pdf [file NIHMS755501-supplement-supp_tables.pdf]

| ID                 | GENE          | logFC-(Tg-AKI/Tg-no AKI) | PValue     |
|--------------------|---------------|--------------------------|------------|
| ENSMUSG00000096403 | NA            | -8.821673306             | 4.10E-13   |
| ENSMUSG00000075391 | NA            | -8.608601931             | 9.91E-21   |
| ENSMUSG00000059040 | ENO1          | -7.337824176             | 1.04E-10   |
| ENSMUSG00000066407 | NA            | -7.199125081             | 4.73E-21   |
| ENSMUSG00000064193 | NA            | -6.569638956             | 1.69E-09   |
| ENSMUSG00000074435 | NA            | -6.478961775             | 3.97E-21   |
| ENSMUSG00000040907 | ATP1A3        | -6.261709666             | 9.15E-22   |
| ENSMUSG00000024029 | TFF3          | -6.026113524             | 1.01E-08   |
| ENSMUSG00000091498 | NA            | -5.477250843             | 5.99E-26   |
| ENSMUSG00000072575 | EDDM3B        | -5.451259097             | 1.54E-16   |
| ENSMUSG00000074479 | NA            | -5.324103569             | 1.59E-05   |
| ENSMUSG00000016349 | EEF1A2        | -5.110094136             | 8.35E-06   |
| ENSMUSG00000074768 | BHMT          | -5.086493433             | 6.77E-09   |
| ENSMUSG00000080242 | ATP6V0C-PS2   | -4.866691637             | 9.71E-24   |
| ENSMUSG00000053852 | GPR112        | -4.694071717             | 0.00023378 |
| ENSMUSG00000040495 | CHRM4         | -4.64910609              | 1.75E-05   |
| ENSMUSG00000021613 | HAPLN1        | -4.584499916             | 3.54E-05   |
| ENSMUSG00000073403 | NA            | -4.577494966             | 1.02E-15   |
| ENSMUSG00000005716 | PVALB         | -4.471391362             | 9.22E-27   |
| ENSMUSG00000079507 | H2-Q1         | -4.443279982             | 1.98E-15   |
| ENSMUSG00000079491 | H2-T10        | -4.376668204             | 3.72E-27   |
| ENSMUSG00000092444 | NA            | -4.164769228             | 5.02E-06   |
| ENSMUSG00000060177 | KLK1B22       | -4.076954659             | 3.00E-09   |
| ENSMUSG00000090817 | GM4450        | -4.00186636              | 4.15E-15   |
| ENSMUSG00000001155 | FTCD          | -3.893922531             | 1.23E-24   |
| ENSMUSG00000003477 | INMT          | -3.87811878              | 4.95E-20   |
| ENSMUSG00000025936 | GM4956        | -3.824609745             | 3.51E-12   |
| ENSMUSG00000030244 | GYS2          | -3.674759223             | 6.17E-23   |
| ENSMUSG00000022366 | SLC22A22      | -3.667861334             | 7.36E-36   |
| ENSMUSG00000041052 | SLC7A13       | -3.557300247             | 1.94E-22   |
| ENSMUSG00000034871 | FAM151A       | -3.554307158             | 3.50E-28   |
| ENSMUSG00000063458 | 1700112E06RIK | -3.533257911             | 3.03E-08   |
| ENSMUSG00000021207 | AKR1C21       | -3.414551258             | 2.44E-36   |
| ENSMUSG00000074218 | COX7A1        | -3.394916172             | 6.05E-21   |
| ENSMUSG00000020051 | PAH           | -3.3895605               | 2.01E-18   |
| ENSMUSG00000063590 | SLC22A28      | -3.366617184             | 2.07E-20   |
| ENSMUSG00000023979 | GUCA1B        | -3.257078303             | 4.16E-05   |
| ENSMUSG00000029445 | HPD           | -3.181631288             | 1.14E-06   |
| ENSMUSG00000038526 | CAR14         | -3.153020571             | 1.88E-17   |
| ENSMUSG00000038704 | ASPDH         | -3.124372742             | 1.95E-37   |
| ENSMUSG00000021416 | ECI3          | -3.096996583             | 3.49E-30   |
| ENSMUSG00000003410 | ELAVL3        | -3.065791247             | 1.23E-06   |

|                     |               |              |            |
|---------------------|---------------|--------------|------------|
| ENSMUSG00000001334  | FNDC5         | -3.062744561 | 2.86E-08   |
| ENSMUSG000000057103 | CML1          | -3.057384905 | 2.79E-15   |
| ENSMUSG000000030825 | HSD17B14      | -3.057069081 | 5.07E-09   |
| ENSMUSG000000039438 | TTC36         | -3.056222944 | 5.57E-24   |
| ENSMUSG000000028919 | ARHGEF19      | -3.022709163 | 7.42E-07   |
| ENSMUSG000000047502 | MROH7         | -2.971001012 | 2.46E-19   |
| ENSMUSG000000095388 | HSD3B4        | -2.928714161 | 1.55E-07   |
| ENSMUSG000000022613 | MIOX          | -2.924509321 | 2.00E-22   |
| ENSMUSG000000021490 | SLC34A1       | -2.899892046 | 8.89E-18   |
| ENSMUSG000000015451 | NA            | -2.898879775 | 1.52E-07   |
| ENSMUSG000000062410 | HSD3B3        | -2.834688713 | 3.45E-10   |
| ENSMUSG000000011148 | ADSSL1        | -2.812184124 | 1.52E-12   |
| ENSMUSG000000045034 | ANKRD34B      | -2.773570614 | 5.14E-06   |
| ENSMUSG000000071633 | GM4952        | -2.768267684 | 3.14E-07   |
| ENSMUSG000000055114 | NA            | -2.764738654 | 1.04E-07   |
| ENSMUSG000000023120 | GM853         | -2.718010085 | 1.84E-10   |
| ENSMUSG000000027965 | OLFM3         | -2.704359906 | 2.75E-07   |
| ENSMUSG000000056973 | CES1D         | -2.688576719 | 4.50E-12   |
| ENSMUSG000000059406 | TMPRSS9       | -2.676984087 | 3.81E-07   |
| ENSMUSG000000058914 | C1QTNF3       | -2.670771833 | 1.88E-28   |
| ENSMUSG000000029059 | FAM213B       | -2.665446699 | 6.38E-17   |
| ENSMUSG000000048368 | OMD           | -2.660770458 | 5.68E-05   |
| ENSMUSG000000053168 | 9030619P08RIK | -2.657371673 | 5.96E-06   |
| ENSMUSG000000001270 | CKB           | -2.651150202 | 8.84E-23   |
| ENSMUSG000000006542 | PRKAG3        | -2.638099426 | 6.86E-05   |
| ENSMUSG000000026348 | ACMSD         | -2.632918576 | 2.09E-07   |
| ENSMUSG000000028571 | CYP2J13       | -2.627263891 | 5.14E-16   |
| ENSMUSG000000026189 | PECR          | -2.621994186 | 5.41E-22   |
| ENSMUSG000000005980 | DNASE1        | -2.619218043 | 1.28E-12   |
| ENSMUSG000000061959 | CES1E         | -2.570634522 | 2.86E-17   |
| ENSMUSG000000040276 | PACSIN1       | -2.56338514  | 4.30E-06   |
| ENSMUSG000000061808 | TTR           | -2.553700483 | 0.01653089 |
| ENSMUSG000000037548 | H2-DMB2       | -2.549527877 | 6.48E-08   |
| ENSMUSG000000036377 | C530008M17RIK | -2.549024058 | 1.51E-05   |
| ENSMUSG000000070530 | WFDC16        | -2.526899211 | 4.13E-05   |
| ENSMUSG000000096062 | NA            | -2.525396506 | 3.20E-06   |
| ENSMUSG000000027227 | SORD          | -2.51877212  | 9.12E-12   |
| ENSMUSG000000072664 | UGT3A1        | -2.511983981 | 7.09E-17   |
| ENSMUSG000000018211 | WFDC15B       | -2.508644954 | 1.43E-19   |
| ENSMUSG000000066097 | CYP2J11       | -2.499458689 | 8.29E-22   |
| ENSMUSG000000022454 | NELL2         | -2.473663785 | 0.00033021 |
| ENSMUSG000000039710 | SLC7A12       | -2.459588252 | 3.43E-05   |
| ENSMUSG000000006469 | SLC34A3       | -2.457487571 | 1.90E-31   |

|                    |           |              |            |
|--------------------|-----------|--------------|------------|
| ENSMUSG00000085772 | NA        | -2.455346583 | 1.41E-11   |
| ENSMUSG00000030498 | GAS2      | -2.451435845 | 1.15E-21   |
| ENSMUSG00000025243 | SLC6A20B  | -2.437935603 | 3.22E-18   |
| ENSMUSG00000036813 | ENTPD8    | -2.43567989  | 1.85E-17   |
| ENSMUSG00000047246 | HIST1H2BC | -2.433291274 | 0.00012337 |
| ENSMUSG00000030228 | PIK3C2G   | -2.425105698 | 6.62E-06   |
| ENSMUSG00000000805 | CAR4      | -2.4183708   | 1.06E-23   |
| ENSMUSG00000032401 | LCTL      | -2.41627906  | 3.51E-05   |
| ENSMUSG00000032010 | USP2      | -2.408441391 | 7.23E-12   |
| ENSMUSG00000078627 | 42073     | -2.39044104  | 0.00253764 |
| ENSMUSG00000063796 | SLC22A8   | -2.377113877 | 2.45E-11   |
| ENSMUSG00000040441 | SLC26A10  | -2.373785784 | 9.52E-06   |
| ENSMUSG00000027887 | SYPL2     | -2.370304038 | 2.62E-11   |
| ENSMUSG00000085057 | NA        | -2.356014337 | 2.94E-06   |
| ENSMUSG00000006342 | SUSD2     | -2.355608296 | 4.96E-26   |
| ENSMUSG00000001467 | CYP51     | -2.350487123 | 1.95E-29   |
| ENSMUSG00000089635 | NA        | -2.337829578 | 0.01071597 |
| ENSMUSG00000029482 | AACS      | -2.299031746 | 6.52E-20   |
| ENSMUSG00000072115 | ANG       | -2.285633545 | 1.66E-05   |
| ENSMUSG00000076928 | NA        | -2.284278178 | 0.00012841 |
| ENSMUSG00000036564 | NDRG4     | -2.280208735 | 6.74E-07   |
| ENSMUSG00000057228 | AADAT     | -2.273894668 | 3.17E-12   |
| ENSMUSG00000027896 | SLC16A4   | -2.269798608 | 3.77E-23   |
| ENSMUSG00000028150 | RORC      | -2.258483197 | 2.29E-08   |
| ENSMUSG00000076441 | ASS1      | -2.223741531 | 2.87E-10   |
| ENSMUSG00000028737 | ALDH4A1   | -2.222470829 | 1.20E-15   |
| ENSMUSG00000022235 | CMBL      | -2.200189219 | 2.42E-15   |
| ENSMUSG00000022763 | AIFM3     | -2.199508286 | 7.57E-18   |
| ENSMUSG00000045282 | TMEM86B   | -2.193066065 | 3.38E-10   |
| ENSMUSG00000022679 | MPV17L    | -2.184505    | 1.29E-18   |
| ENSMUSG00000039364 | SECTM1B   | -2.182643869 | 4.93E-06   |
| ENSMUSG00000018554 | YBX2      | -2.181573142 | 2.24E-20   |
| ENSMUSG00000023262 | ACY1      | -2.178933803 | 1.81E-11   |
| ENSMUSG00000055866 | PER2      | -2.155033465 | 7.21E-05   |
| ENSMUSG00000061906 | UGT2B38   | -2.154679249 | 1.18E-13   |
| ENSMUSG00000025610 | MAP3K7CL  | -2.153997132 | 1.57E-10   |
| ENSMUSG00000068086 | CYP2D9    | -2.149786701 | 4.75E-05   |
| ENSMUSG00000035699 | SLC51A    | -2.147521933 | 1.99E-12   |
| ENSMUSG00000043789 | VWCE      | -2.147173803 | 2.81E-09   |
| ENSMUSG00000073405 | NA        | -2.143974388 | 3.43E-09   |
| ENSMUSG00000048911 | RNF24     | -2.14123805  | 6.62E-24   |
| ENSMUSG00000029193 | CCKAR     | -2.13943726  | 1.54E-08   |
| ENSMUSG00000021876 | RNASE4    | -2.136689597 | 9.58E-08   |

|                    |               |              |            |
|--------------------|---------------|--------------|------------|
| ENSMUSG00000083282 | CTSF          | -2.13081569  | 1.62E-10   |
| ENSMUSG00000057880 | ABAT          | -2.130698096 | 6.96E-13   |
| ENSMUSG00000024743 | SYT7          | -2.126590517 | 9.51E-10   |
| ENSMUSG00000069805 | FBP1          | -2.124667063 | 2.77E-15   |
| ENSMUSG00000026649 | 1700009P17RIK | -2.119235533 | 2.01E-05   |
| ENSMUSG00000022445 | CYP2D26       | -2.109322947 | 3.36E-16   |
| ENSMUSG00000080115 | LOC100504608  | -2.098332672 | 1.09E-06   |
| ENSMUSG00000036764 | DNAJC12       | -2.097947978 | 2.14E-12   |
| ENSMUSG00000046840 | 0610008F07RIK | -2.082376807 | 9.20E-07   |
| ENSMUSG00000013611 | SNX31         | -2.075517406 | 4.59E-09   |
| ENSMUSG00000006529 | ITIH1         | -2.071812538 | 1.11E-07   |
| ENSMUSG00000010066 | CACNA2D2      | -2.067797884 | 0.00024884 |
| ENSMUSG00000019906 | LIN7A         | -2.064656229 | 1.12E-07   |
| ENSMUSG00000025059 | GYK           | -2.050506829 | 7.17E-10   |
| ENSMUSG00000020774 | ASPA          | -2.049252758 | 7.89E-10   |
| ENSMUSG00000024757 | SLC22A19      | -2.048539379 | 2.70E-07   |
| ENSMUSG00000089712 | NA            | -2.048212193 | 0.00039649 |
| ENSMUSG00000025350 | RDH5          | -2.044960872 | 3.67E-11   |
| ENSMUSG00000078439 | 2210404O07RIK | -2.036019777 | 2.59E-22   |
| ENSMUSG00000031725 | CES1F         | -2.034241604 | 1.06E-13   |
| ENSMUSG00000059027 | 9630013D21RIK | -2.027625783 | 4.68E-08   |
| ENSMUSG00000075044 | SLC22A29      | -2.025151598 | 3.73E-05   |
| ENSMUSG00000037005 | XPNPEP2       | -2.020153112 | 1.26E-07   |
| ENSMUSG00000025732 | FAM195A       | -2.005811863 | 6.56E-27   |
| ENSMUSG00000044628 | RNF208        | -2.00114205  | 1.92E-10   |
| ENSMUSG00000030769 | SLC5A11       | -1.998437435 | 2.47E-09   |
| ENSMUSG00000039154 | SHD           | -1.996427018 | 1.71E-07   |
| ENSMUSG00000025937 | LACTB2        | -1.991038478 | 3.85E-11   |
| ENSMUSG00000097383 | NA            | -1.983887138 | 2.91E-09   |
| ENSMUSG00000039519 | CYP7B1        | -1.982390236 | 0.00040354 |
| ENSMUSG00000000673 | HAAO          | -1.981008346 | 1.86E-23   |
| ENSMUSG00000019232 | ETNPPL        | -1.968443198 | 1.12E-06   |
| ENSMUSG00000028773 | FABP3         | -1.963005496 | 2.40E-13   |
| ENSMUSG00000024039 | CBS           | -1.961611979 | 2.97E-18   |
| ENSMUSG00000044165 | BCL2L15       | -1.954387704 | 0.01224401 |
| ENSMUSG00000004341 | GPX6          | -1.954340454 | 2.23E-10   |
| ENSMUSG00000040258 | NXPH4         | -1.954066583 | 0.00196325 |
| ENSMUSG00000029864 | GSTK1         | -1.953408743 | 4.93E-09   |
| ENSMUSG00000074639 | BC089597      | -1.950958697 | 3.35E-13   |
| ENSMUSG00000029369 | AFM           | -1.949176109 | 6.45E-17   |
| ENSMUSG00000064342 | NA            | -1.948972417 | 1.90E-05   |
| ENSMUSG00000059022 | KCP           | -1.948753764 | 4.33E-09   |
| ENSMUSG00000034875 | NUDT19        | -1.946874468 | 1.80E-05   |

|                    |              |              |            |
|--------------------|--------------|--------------|------------|
| ENSMUSG00000034739 | MFRP         | -1.942157851 | 0.00300854 |
| ENSMUSG00000038641 | AKR1D1       | -1.93474019  | 7.52E-05   |
| ENSMUSG00000029122 | EVC          | -1.930653754 | 1.33E-15   |
| ENSMUSG00000024727 | TRPM6        | -1.914586117 | 2.20E-09   |
| ENSMUSG00000027239 | MDK          | -1.911503053 | 4.46E-06   |
| ENSMUSG00000086054 | NA           | -1.910417331 | 1.52E-08   |
| ENSMUSG00000027332 | IVD          | -1.91014451  | 3.61E-13   |
| ENSMUSG00000045104 | NA           | -1.900256275 | 0.01712537 |
| ENSMUSG00000038286 | BPHL         | -1.90007434  | 5.70E-17   |
| ENSMUSG00000054986 | SEC14L3      | -1.884582941 | 1.14E-06   |
| ENSMUSG00000022186 | OXCT1        | -1.864949592 | 1.82E-10   |
| ENSMUSG00000020059 | SYCP3        | -1.861246806 | 7.97E-06   |
| ENSMUSG00000004655 | AQP1         | -1.850912178 | 2.86E-10   |
| ENSMUSG00000023044 | CSAD         | -1.843432509 | 2.09E-19   |
| ENSMUSG00000000154 | SLC22A18     | -1.835575217 | 4.82E-15   |
| ENSMUSG00000023031 | CELA1        | -1.825403495 | 2.74E-06   |
| ENSMUSG00000068205 | LOC101056500 | -1.822738305 | 4.72E-15   |
| ENSMUSG00000017718 | AFMID        | -1.818195728 | 5.34E-08   |
| ENSMUSG00000025479 | CYP2E1       | -1.815861704 | 3.50E-05   |
| ENSMUSG00000039323 | IGFBP2       | -1.812836246 | 0.00503613 |
| ENSMUSG00000032224 | FAM81A       | -1.803062054 | 4.70E-10   |
| ENSMUSG00000038298 | PDZK1        | -1.801932341 | 1.17E-07   |
| ENSMUSG00000018459 | SLC13A3      | -1.798665356 | 8.72E-06   |
| ENSMUSG00000036892 | PRODH2       | -1.793900832 | 1.27E-11   |
| ENSMUSG00000023153 | TMEM52       | -1.785455954 | 6.19E-05   |
| ENSMUSG00000015401 | TMEM27       | -1.783302021 | 1.64E-09   |
| ENSMUSG00000053303 | SLC22A26     | -1.78282995  | 0.00329271 |
| ENSMUSG00000028713 | CYP4B1       | -1.780016272 | 2.63E-07   |
| ENSMUSG00000043719 | COL6A6       | -1.779109753 | 0.00244607 |
| ENSMUSG00000015083 | C8G          | -1.774444084 | 4.97E-09   |
| ENSMUSG00000042210 | ABHD14A      | -1.768130674 | 2.36E-14   |
| ENSMUSG00000021228 | ACOT3        | -1.76247932  | 1.90E-05   |
| ENSMUSG00000030945 | ACSM2        | -1.761554461 | 3.58E-07   |
| ENSMUSG00000020150 | GAMT         | -1.760080881 | 1.97E-08   |
| ENSMUSG00000060240 | CEND1        | -1.759953437 | 0.00242842 |
| ENSMUSG00000044249 | DEFB29       | -1.756915916 | 2.07E-13   |
| ENSMUSG00000024665 | FADS2        | -1.748618966 | 1.23E-16   |
| ENSMUSG00000029650 | SLC46A3      | -1.741909501 | 6.13E-14   |
| ENSMUSG00000054474 | THNSL2       | -1.740769902 | 1.42E-11   |
| ENSMUSG00000027761 | AADAC        | -1.725382106 | 3.43E-13   |
| ENSMUSG00000000486 | 42248        | -1.724201434 | 2.04E-05   |
| ENSMUSG00000026866 | KYNU         | -1.717805125 | 0.00094281 |
| ENSMUSG00000024866 | ACY3         | -1.71749579  | 1.13E-06   |

|                     |               |              |            |
|---------------------|---------------|--------------|------------|
| ENSMUSG00000053329  | LOC100046684  | -1.711876485 | 1.83E-16   |
| ENSMUSG00000002908  | KCNN1         | -1.708640443 | 7.31E-06   |
| ENSMUSG000000024064 | GALNT14       | -1.699801198 | 6.52E-11   |
| ENSMUSG000000066071 | CYP4A12A      | -1.697309613 | 0.00016495 |
| ENSMUSG000000062908 | ACADM         | -1.690445374 | 7.83E-10   |
| ENSMUSG000000032590 | APEH          | -1.687561366 | 3.16E-14   |
| ENSMUSG000000033427 | UPB1          | -1.686948613 | 7.72E-13   |
| ENSMUSG000000079011 | NA            | -1.686784291 | 0.00619017 |
| ENSMUSG000000025911 | ADHFE1        | -1.685633319 | 5.55E-12   |
| ENSMUSG000000024899 | PAPSS2        | -1.681068199 | 5.69E-11   |
| ENSMUSG000000025871 | 4833439L19RIK | -1.674355207 | 4.59E-09   |
| ENSMUSG000000032648 | PYGM          | -1.673258938 | 3.72E-07   |
| ENSMUSG000000034258 | MFSD7C        | -1.664377725 | 1.89E-07   |
| ENSMUSG000000032047 | ACAT1         | -1.652353549 | 1.70E-09   |
| ENSMUSG000000000958 | SLC7A7        | -1.648847065 | 7.55E-06   |
| ENSMUSG000000086784 | ISOC2A        | -1.64621917  | 2.46E-07   |
| ENSMUSG000000052520 | CYP2J5        | -1.646081359 | 3.97E-10   |
| ENSMUSG000000029499 | PXMP2         | -1.643426711 | 1.89E-08   |
| ENSMUSG000000031431 | TSC22D3       | -1.642428439 | 4.69E-05   |
| ENSMUSG000000055301 | ADH7          | -1.641099331 | 0.0001619  |
| ENSMUSG000000001095 | SLC13A2       | -1.638120478 | 4.16E-08   |
| ENSMUSG000000029311 | HSD17B11      | -1.63661966  | 4.66E-07   |
| ENSMUSG000000026890 | LHX6          | -1.63636095  | 0.01496864 |
| ENSMUSG000000026368 | F13B          | -1.635257536 | 2.55E-09   |
| ENSMUSG000000038497 | TMCO3         | -1.634613596 | 2.46E-18   |
| ENSMUSG000000036832 | LPAR3         | -1.634281301 | 0.00014558 |
| ENSMUSG000000035948 | ACSS3         | -1.633825199 | 0.001333   |
| ENSMUSG000000006235 | EPOR          | -1.628188147 | 0.0006868  |
| ENSMUSG000000048997 | ATXN7L2       | -1.617502203 | 1.26E-09   |
| ENSMUSG000000039652 | CPEB3         | -1.616255562 | 3.87E-09   |
| ENSMUSG000000087305 | A430035B10RIK | -1.608738385 | 0.00066682 |
| ENSMUSG000000038085 | CNBD2         | -1.608595877 | 3.45E-07   |
| ENSMUSG000000029162 | KHK           | -1.603619008 | 8.00E-13   |
| ENSMUSG000000034796 | CPNE7         | -1.597774559 | 0.00065258 |
| ENSMUSG000000031770 | HERPUD1       | -1.594800597 | 1.80E-06   |
| ENSMUSG000000030657 | XYLT1         | -1.59408788  | 2.86E-09   |
| ENSMUSG000000048731 | GGNBP1        | -1.59162132  | 1.76E-10   |
| ENSMUSG000000041698 | SLCO1A1       | -1.585817998 | 2.04E-09   |
| ENSMUSG000000030359 | PZP           | -1.584534349 | 4.69E-07   |
| ENSMUSG000000015568 | LPL           | -1.583159109 | 7.19E-06   |
| ENSMUSG000000025726 | SLC28A1       | -1.582511156 | 8.42E-05   |
| ENSMUSG000000028167 | BDH2          | -1.581078533 | 1.61E-12   |
| ENSMUSG000000020098 | PCBD1         | -1.579482455 | 7.92E-15   |

|                    |               |              |            |
|--------------------|---------------|--------------|------------|
| ENSMUSG00000023122 | SULT1C2       | -1.579157062 | 5.08E-05   |
| ENSMUSG00000025762 | LOC100503217  | -1.577684441 | 2.08E-05   |
| ENSMUSG00000017453 | PIPOX         | -1.575142251 | 6.82E-10   |
| ENSMUSG00000034449 | DHRS11        | -1.574668417 | 1.44E-15   |
| ENSMUSG00000039783 | KMO           | -1.570709694 | 4.29E-09   |
| ENSMUSG00000025453 | NNT           | -1.570107838 | 3.80E-13   |
| ENSMUSG00000055333 | FAT2          | -1.564378337 | 0.00054362 |
| ENSMUSG00000064202 | 4430402I18RIK | -1.561832867 | 2.69E-05   |
| ENSMUSG00000027359 | SLC27A2       | -1.561133227 | 3.02E-06   |
| ENSMUSG00000039481 | NRTN          | -1.560816521 | 1.46E-06   |
| ENSMUSG00000021646 | MCCC2         | -1.559010236 | 7.95E-12   |
| ENSMUSG00000050097 | CES2B         | -1.551686234 | 2.15E-05   |
| ENSMUSG00000038224 | SERPINF2      | -1.54946341  | 1.64E-12   |
| ENSMUSG00000063564 | COL23A1       | -1.548837894 | 0.00279005 |
| ENSMUSG00000055430 | NAP1L5        | -1.545805283 | 0.0025029  |
| ENSMUSG00000092626 | NA            | -1.545525798 | 0.00083052 |
| ENSMUSG00000020593 | LPIN1         | -1.543728502 | 1.76E-08   |
| ENSMUSG00000029102 | HGFAC         | -1.537401064 | 0.00235753 |
| ENSMUSG00000097930 | NA            | -1.537216544 | 0.00102513 |
| ENSMUSG00000003809 | GCDH          | -1.536088857 | 3.41E-09   |
| ENSMUSG00000020186 | CSRP2         | -1.531931258 | 8.01E-12   |
| ENSMUSG00000042073 | ABHD14B       | -1.531879799 | 1.21E-11   |
| ENSMUSG00000039450 | DCXR          | -1.527563943 | 6.28E-17   |
| ENSMUSG00000034226 | RHOV          | -1.527471397 | 9.69E-05   |
| ENSMUSG00000039395 | MREG          | -1.527116575 | 7.72E-05   |
| ENSMUSG00000052595 | A1CF          | -1.524365989 | 1.79E-07   |
| ENSMUSG00000097258 | NA            | -1.517760624 | 0.00138502 |
| ENSMUSG00000005681 | APOA2         | -1.516724935 | 0.00951462 |
| ENSMUSG00000022490 | PPP1R1A       | -1.513950859 | 1.73E-06   |
| ENSMUSG00000089678 | AGXT2         | -1.512814218 | 1.71E-10   |
| ENSMUSG00000032114 | SLC37A4       | -1.512118012 | 7.11E-08   |
| ENSMUSG00000022751 | NIT2          | -1.511582769 | 5.57E-14   |
| ENSMUSG00000030108 | SLC6A13       | -1.509728407 | 1.10E-12   |
| ENSMUSG00000042096 | DAO           | -1.506018061 | 4.38E-10   |
| ENSMUSG00000038782 | 170028J19RIK  | -1.504388828 | 3.06E-05   |
| ENSMUSG00000020435 | OSBP2         | -1.50395454  | 4.25E-11   |
| ENSMUSG00000020577 | TSPAN13       | -1.500669909 | 1.11E-11   |
| ENSMUSG00000080950 | NA            | -1.49991807  | 0.00396177 |
| ENSMUSG00000025903 | LYPLA1        | -1.498876889 | 7.05E-10   |
| ENSMUSG00000028573 | FGGY          | -1.498806478 | 2.07E-12   |
| ENSMUSG00000028528 | DNAJC6        | -1.49699558  | 5.45E-06   |
| ENSMUSG00000029269 | SULT1B1       | -1.496726089 | 0.00021396 |
| ENSMUSG00000002769 | GNMT          | -1.496261253 | 8.34E-07   |

|                     |               |              |            |
|---------------------|---------------|--------------|------------|
| ENSMUSG00000029072  | TAS1R3        | -1.49265948  | 0.00081736 |
| ENSMUSG00000041650  | PCCA          | -1.492570768 | 9.18E-14   |
| ENSMUSG00000025776  | CRISPLD1      | -1.491090977 | 0.00104379 |
| ENSMUSG00000024421  | LAMA3         | -1.490654003 | 0.00075151 |
| ENSMUSG00000036242  | 3632451O06RIK | -1.485892131 | 5.31E-05   |
| ENSMUSG00000022546  | GPT           | -1.484489064 | 4.28E-06   |
| ENSMUSG00000034427  | MYO15B        | -1.484257659 | 2.73E-10   |
| ENSMUSG00000045257  | MORN2         | -1.482811803 | 1.25E-07   |
| ENSMUSG00000041073  | NACAD         | -1.482082384 | 0.00180565 |
| ENSMUSG00000015806  | QDPR          | -1.478770423 | 4.49E-11   |
| ENSMUSG00000033533  | ACSM1         | -1.477201211 | 3.49E-09   |
| ENSMUSG00000026568  | MPC2          | -1.476237301 | 1.88E-13   |
| ENSMUSG00000024644  | CNDP2         | -1.475761258 | 2.28E-08   |
| ENSMUSG00000010122  | SLC47A1       | -1.474161321 | 1.09E-06   |
| ENSMUSG00000001143  | LMAN2L        | -1.468440026 | 2.30E-14   |
| ENSMUSG000000087211 | 1500016L03RIK | -1.466153957 | 1.84E-05   |
| ENSMUSG00000027597  | LOC101056658  | -1.460903949 | 2.05E-08   |
| ENSMUSG00000060224  | PYROXD2       | -1.458941431 | 4.94E-09   |
| ENSMUSG00000039376  | SYNPO2L       | -1.457889161 | 0.00513944 |
| ENSMUSG00000028743  | AKR7A5        | -1.456807192 | 3.52E-12   |
| ENSMUSG00000037071  | SCD1          | -1.452280425 | 8.48E-05   |
| ENSMUSG00000079261  | GM15217       | -1.450984422 | 2.41E-10   |
| ENSMUSG00000003526  | PRODH         | -1.449496428 | 4.79E-05   |
| ENSMUSG00000030541  | IDH2          | -1.448128945 | 2.88E-08   |
| ENSMUSG00000038515  | GRTP1         | -1.442171801 | 4.39E-06   |
| ENSMUSG00000030880  | POLR3E        | -1.435405019 | 0.00011991 |
| ENSMUSG00000031144  | SYP           | -1.435098312 | 0.00158729 |
| ENSMUSG00000041644  | SLC5A12       | -1.427992896 | 0.00101879 |
| ENSMUSG00000061815  | RUFY4         | -1.426846761 | 0.00028066 |
| ENSMUSG00000031712  | IL15          | -1.426631079 | 1.12E-06   |
| ENSMUSG00000049152  | UGT3A2        | -1.421532279 | 2.08E-07   |
| ENSMUSG00000079262  | SLCO1A6       | -1.421525212 | 0.0001628  |
| ENSMUSG00000028307  | ALDOB         | -1.419437205 | 3.22E-05   |
| ENSMUSG00000009614  | SARDH         | -1.419196384 | 6.09E-12   |
| ENSMUSG00000026986  | HNMT          | -1.417602921 | 8.57E-05   |
| ENSMUSG00000022180  | SLC7A8        | -1.415496009 | 5.69E-05   |
| ENSMUSG00000022219  | CIDEB         | -1.413486471 | 2.11E-12   |
| ENSMUSG00000001666  | DDT           | -1.41315578  | 9.62E-13   |
| ENSMUSG00000036083  | SLC17A3       | -1.412723566 | 1.86E-06   |
| ENSMUSG00000004035  | GSTM7         | -1.410765524 | 0.00018484 |
| ENSMUSG00000028399  | PTPRD         | -1.409497477 | 3.17E-06   |
| ENSMUSG00000040213  | CCBL2         | -1.408496484 | 3.12E-08   |
| ENSMUSG00000037780  | MBL1          | -1.401021054 | 0.00382408 |



|                    |               |              |            |
|--------------------|---------------|--------------|------------|
| ENSMUSG00000046408 | 1700067K01RIK | -1.399598526 | 0.00122661 |
| ENSMUSG00000024955 | ESRRA         | -1.39773705  | 1.53E-10   |
| ENSMUSG00000062054 | IAH1          | -1.39317148  | 2.35E-10   |
| ENSMUSG00000055675 | KBTBD11       | -1.386162468 | 2.90E-13   |
| ENSMUSG00000023921 | MUT           | -1.384207593 | 3.28E-08   |
| ENSMUSG00000004558 | NDRG2         | -1.382870687 | 4.81E-08   |
| ENSMUSG00000022821 | HGD           | -1.381415117 | 1.35E-08   |
| ENSMUSG00000025486 | SIRT3         | -1.380005746 | 9.48E-10   |
| ENSMUSG00000026220 | SLC16A14      | -1.379510911 | 0.00776515 |
| ENSMUSG00000002475 | ABHD3         | -1.377660513 | 6.25E-09   |
| ENSMUSG00000029053 | PRKCZ         | -1.375505674 | 8.84E-09   |
| ENSMUSG00000029843 | SLC13A4       | -1.365650193 | 0.00134762 |
| ENSMUSG00000025533 | ASL           | -1.365230352 | 9.38E-09   |
| ENSMUSG00000034664 | ITGA2B        | -1.362606713 | 2.86E-06   |
| ENSMUSG00000020189 | OSBPL8        | -1.361009178 | 2.30E-11   |
| ENSMUSG00000028603 | SCP2          | -1.357557715 | 1.03E-05   |
| ENSMUSG00000030703 | GDPD3         | -1.355441142 | 0.00107225 |
| ENSMUSG00000019989 | ENPP3         | -1.354827045 | 7.06E-08   |
| ENSMUSG00000011179 | ODC1          | -1.354673242 | 6.93E-07   |
| ENSMUSG00000026259 | NGEF          | -1.353180701 | 1.25E-10   |
| ENSMUSG00000044986 | TST           | -1.352304619 | 1.04E-10   |
| ENSMUSG00000037573 | TOB1          | -1.349390213 | 6.48E-12   |
| ENSMUSG00000040181 | FMO1          | -1.349017646 | 6.81E-06   |
| ENSMUSG00000078963 | HSBP1L1       | -1.345165922 | 0.00439588 |
| ENSMUSG00000085455 | NA            | -1.345142251 | 7.94E-05   |
| ENSMUSG00000034762 | GLIS1         | -1.34310721  | 9.68E-07   |
| ENSMUSG00000033429 | MCEE          | -1.340030409 | 1.32E-08   |
| ENSMUSG00000002346 | SLC25A42      | -1.338883344 | 0.0002584  |
| ENSMUSG00000026200 | GLB1L         | -1.325066409 | 4.02E-08   |
| ENSMUSG00000031517 | GPM6A         | -1.319966818 | 4.30E-09   |
| ENSMUSG00000014633 | CMC2          | -1.317880929 | 1.74E-07   |
| ENSMUSG00000028125 | ABCA4         | -1.314827608 | 5.42E-05   |
| ENSMUSG00000033676 | GABRB3        | -1.314354487 | 0.00920917 |
| ENSMUSG00000045294 | INSIG1        | -1.313936679 | 9.75E-05   |
| ENSMUSG00000039062 | ANPEP         | -1.313420942 | 2.51E-07   |
| ENSMUSG00000019944 | RHOBTB1       | -1.310976968 | 8.31E-05   |
| ENSMUSG00000039824 | MYL6B         | -1.307780631 | 4.05E-06   |
| ENSMUSG00000020321 | MDH1          | -1.305202408 | 8.69E-07   |
| ENSMUSG00000067071 | HES6          | -1.30345389  | 4.81E-07   |
| ENSMUSG00000086914 | NA            | -1.303121208 | 0.00131315 |
| ENSMUSG00000040966 | SLC22A2       | -1.300974595 | 2.65E-10   |
| ENSMUSG00000027371 | FAHD2A        | -1.300335518 | 1.05E-08   |
| ENSMUSG00000028601 | ECHDC2        | -1.29928466  | 3.86E-09   |

|                    |               |              |            |
|--------------------|---------------|--------------|------------|
| ENSMUSG00000025731 | 0610011F06RIK | -1.29655232  | 3.84E-11   |
| ENSMUSG00000034858 | FAM214A       | -1.295678095 | 1.71E-05   |
| ENSMUSG00000029103 | LRPAP1        | -1.294585235 | 5.47E-10   |
| ENSMUSG00000021974 | FGF9          | -1.292937    | 3.25E-07   |
| ENSMUSG00000097762 | NA            | -1.292917413 | 0.00063452 |
| ENSMUSG00000005320 | FGFR4         | -1.292259042 | 1.84E-10   |
| ENSMUSG00000026489 | ADCK3         | -1.290781958 | 2.97E-09   |
| ENSMUSG00000024180 | TMEM8         | -1.29007349  | 2.95E-07   |
| ENSMUSG00000095687 | RNASET2B      | -1.289064054 | 3.91E-05   |
| ENSMUSG00000020641 | RSAD2         | -1.287936913 | 8.04E-05   |
| ENSMUSG00000022580 | RHPN1         | -1.28654351  | 6.83E-07   |
| ENSMUSG00000006717 | ACOT13        | -1.285436714 | 6.53E-08   |
| ENSMUSG00000074284 | NA            | -1.277510107 | 0.00598129 |
| ENSMUSG00000097796 | GM16702       | -1.276132715 | 0.0035525  |
| ENSMUSG00000028469 | NPR2          | -1.27493835  | 5.37E-09   |
| ENSMUSG00000038967 | PDK2          | -1.274591331 | 3.16E-06   |
| ENSMUSG00000033488 | BC026585      | -1.272847185 | 7.84E-10   |
| ENSMUSG00000030004 | NAT8          | -1.272010617 | 0.00023577 |
| ENSMUSG00000042797 | AQP11         | -1.26879793  | 9.23E-06   |
| ENSMUSG00000089875 | ETOHD2        | -1.268314451 | 0.00124604 |
| ENSMUSG00000066026 | DHRS3         | -1.266789106 | 1.99E-09   |
| ENSMUSG00000006517 | MVD           | -1.266658648 | 3.22E-07   |
| ENSMUSG00000037477 | TBX10         | -1.264478744 | 0.00885092 |
| ENSMUSG00000040943 | TET2          | -1.263370113 | 3.68E-09   |
| ENSMUSG00000027306 | NUSAP1        | -1.260932198 | 0.00041084 |
| ENSMUSG00000023073 | SLC10A2       | -1.260908426 | 1.11E-05   |
| ENSMUSG00000029553 | TFEC          | -1.256526825 | 4.09E-07   |
| ENSMUSG00000085279 | NA            | -1.253814772 | 3.06E-05   |
| ENSMUSG00000034785 | DIO1          | -1.253791264 | 1.24E-05   |
| ENSMUSG00000021371 | MCUR1         | -1.250575256 | 3.64E-09   |
| ENSMUSG00000022353 | MTSS1         | -1.248332255 | 4.97E-08   |
| ENSMUSG00000060376 | BCKDHA        | -1.247987464 | 3.71E-08   |
| ENSMUSG00000026179 | PNKD          | -1.247831598 | 3.74E-09   |
| ENSMUSG00000021238 | ALDH6A1       | -1.246686855 | 5.00E-05   |
| ENSMUSG00000063683 | GLYAT         | -1.244165492 | 1.53E-06   |
| ENSMUSG00000002204 | NAPSA         | -1.241375027 | 5.53E-05   |
| ENSMUSG00000056687 | GM11696       | -1.240237617 | 0.00432118 |
| ENSMUSG00000035473 | GALM          | -1.240050981 | 6.68E-07   |
| ENSMUSG00000053897 | SLC39A8       | -1.239765863 | 1.72E-09   |
| ENSMUSG00000019278 | DPEP1         | -1.238980162 | 1.18E-08   |
| ENSMUSG00000040170 | FMO2          | -1.238604104 | 1.39E-06   |
| ENSMUSG00000018102 | HIST1H2BG     | -1.238006684 | 2.17E-11   |
| ENSMUSG00000024424 | TTC39C        | -1.23687367  | 1.46E-06   |

|                    |          |              |            |
|--------------------|----------|--------------|------------|
| ENSMUSG00000020681 | ACE      | -1.236210031 | 9.38E-11   |
| ENSMUSG00000021414 | FAM217A  | -1.235626138 | 0.00241381 |
| ENSMUSG00000023914 | MEP1A    | -1.23364196  | 2.72E-06   |
| ENSMUSG00000054312 | MRPS21   | -1.232427268 | 3.04E-09   |
| ENSMUSG00000021306 | GPR137B  | -1.231249086 | 6.37E-09   |
| ENSMUSG00000030562 | NOX4     | -1.228585021 | 4.00E-05   |
| ENSMUSG00000035936 | ALDH5A1  | -1.227566539 | 1.16E-08   |
| ENSMUSG00000025403 | SHMT2    | -1.227225187 | 1.86E-08   |
| ENSMUSG00000019876 | PKIB     | -1.225736721 | 0.00017385 |
| ENSMUSG00000032098 | TREH     | -1.225481861 | 1.04E-09   |
| ENSMUSG00000075304 | SP5      | -1.225186113 | 8.23E-07   |
| ENSMUSG00000073633 | FBXO36   | -1.224820237 | 8.87E-07   |
| ENSMUSG00000054619 | METTL7A1 | -1.224174792 | 5.34E-07   |
| ENSMUSG00000043668 | TOX3     | -1.222451997 | 0.00029263 |
| ENSMUSG00000021670 | HMGCR    | -1.222022503 | 2.60E-05   |
| ENSMUSG00000024130 | ABCA3    | -1.218941846 | 3.62E-07   |
| ENSMUSG00000032263 | BCKDHB   | -1.218770245 | 1.94E-07   |
| ENSMUSG00000032758 | KAP      | -1.212540095 | 0.00211194 |
| ENSMUSG00000035561 | ALDH1B1  | -1.212438506 | 0.00336254 |
| ENSMUSG00000044475 | ASCC1    | -1.20801678  | 5.63E-07   |
| ENSMUSG00000025854 | FAM20C   | -1.207616008 | 1.84E-07   |
| ENSMUSG00000030674 | QPRT     | -1.207089767 | 0.00077336 |
| ENSMUSG00000025933 | TMEM14A  | -1.205770882 | 0.00126561 |
| ENSMUSG00000000340 | DBT      | -1.203756424 | 3.09E-09   |
| ENSMUSG00000024354 | SLC23A1  | -1.203555113 | 1.81E-06   |
| ENSMUSG00000071711 | MPST     | -1.202582256 | 8.34E-11   |
| ENSMUSG00000041930 | FAM222A  | -1.202088504 | 0.00039615 |
| ENSMUSG00000015474 | PPT2     | -1.200014922 | 1.01E-08   |
| ENSMUSG00000023829 | SLC22A1  | -1.19977751  | 9.22E-08   |
| ENSMUSG00000021384 | SUSD3    | -1.199256572 | 0.00020582 |
| ENSMUSG00000079508 | APOO     | -1.199192011 | 4.93E-08   |
| ENSMUSG00000022323 | HRSP12   | -1.197922093 | 2.98E-05   |
| ENSMUSG00000001786 | FBXO7    | -1.196937718 | 8.69E-11   |
| ENSMUSG00000022236 | ROPN1L   | -1.196319217 | 0.00136085 |
| ENSMUSG00000001663 | GSTT1    | -1.195081751 | 4.24E-06   |
| ENSMUSG00000051177 | PLCB1    | -1.191511918 | 6.37E-06   |
| ENSMUSG00000040950 | MGL2     | -1.19110436  | 0.01463748 |
| ENSMUSG00000033578 | TMEM35   | -1.190036265 | 0.00020335 |
| ENSMUSG00000038195 | RILP     | -1.188870196 | 1.55E-06   |
| ENSMUSG00000028013 | PPA2     | -1.187781491 | 1.11E-09   |
| ENSMUSG00000026730 | PTER     | -1.186713685 | 0.00029132 |
| ENSMUSG00000020163 | UQCR11   | -1.186275598 | 1.85E-09   |
| ENSMUSG00000029735 | TPK1     | -1.185369311 | 2.09E-10   |

|                     |               |              |            |
|---------------------|---------------|--------------|------------|
| ENSMUSG00000026687  | ALDH9A1       | -1.184687785 | 3.82E-06   |
| ENSMUSG00000040111  | GRAMD1B       | -1.183525194 | 1.15E-07   |
| ENSMUSG00000028545  | BEND5         | -1.181501692 | 2.75E-05   |
| ENSMUSG00000020566  | ATP6V1C2      | -1.18112329  | 2.33E-07   |
| ENSMUSG00000029776  | HIBADH        | -1.17722906  | 1.04E-06   |
| ENSMUSG00000006818  | SOD2          | -1.176713518 | 3.34E-09   |
| ENSMUSG00000034171  | FAAH          | -1.176002227 | 5.20E-07   |
| ENSMUSG00000024131  | SLC3A1        | -1.175183161 | 1.89E-06   |
| ENSMUSG00000000308  | CKMT1         | -1.175009483 | 5.72E-07   |
| ENSMUSG00000028865  | CD164L2       | -1.173522049 | 0.00961343 |
| ENSMUSG00000069456  | RDH16         | -1.173496736 | 1.65E-06   |
| ENSMUSG00000042102  | DMGDH         | -1.171946993 | 1.02E-09   |
| ENSMUSG00000002797  | GGCT          | -1.171867572 | 2.10E-05   |
| ENSMUSG00000029228  | LNK1          | -1.171654119 | 0.00047123 |
| ENSMUSG00000020087  | TYSND1        | -1.171046791 | 2.64E-10   |
| ENSMUSG00000028461  | CCDC107       | -1.170884281 | 3.62E-10   |
| ENSMUSG00000027673  | NDUFB5        | -1.170345874 | 1.69E-10   |
| ENSMUSG00000039988  | ANKRD13C      | -1.170076254 | 1.63E-08   |
| ENSMUSG00000049799  | LRRC19        | -1.169190735 | 7.16E-06   |
| ENSMUSG00000047284  | NEURL4        | -1.166517109 | 2.74E-10   |
| ENSMUSG00000023272  | CRELD2        | -1.162832571 | 0.00783729 |
| ENSMUSG00000035637  | GRHPR         | -1.159856617 | 3.59E-08   |
| ENSMUSG00000036278  | MACROD1       | -1.158705943 | 4.78E-06   |
| ENSMUSG00000024892  | PCX           | -1.157973404 | 3.07E-05   |
| ENSMUSG00000018401  | MTMR4         | -1.155384069 | 1.12E-06   |
| ENSMUSG00000001827  | FOLR1         | -1.154713147 | 3.51E-08   |
| ENSMUSG000000055862 | IZUMO4        | -1.151871682 | 0.00042808 |
| ENSMUSG000000064360 | ND3           | -1.148833161 | 9.61E-05   |
| ENSMUSG000000090231 | CFB           | -1.148340915 | 6.23E-05   |
| ENSMUSG00000024391  | APOM          | -1.147653834 | 6.03E-05   |
| ENSMUSG00000028032  | PAPSS1        | -1.146915305 | 5.25E-07   |
| ENSMUSG00000068860  | GM128         | -1.146739242 | 0.0138741  |
| ENSMUSG00000021846  | PELI2         | -1.145868169 | 1.29E-08   |
| ENSMUSG00000006057  | ATP5G1        | -1.144584537 | 2.64E-08   |
| ENSMUSG00000021255  | ESRRB         | -1.143376444 | 0.00014116 |
| ENSMUSG00000021639  | GTF2H2        | -1.142770527 | 1.61E-06   |
| ENSMUSG00000031938  | 4931406C07RIK | -1.141673782 | 0.00015056 |
| ENSMUSG00000063903  | KLK1          | -1.140498452 | 2.31E-05   |
| ENSMUSG00000037754  | PPP1R16B      | -1.140124151 | 0.00323602 |
| ENSMUSG00000030630  | FAH           | -1.13865716  | 7.08E-06   |
| ENSMUSG00000030781  | SLC5A2        | -1.138238554 | 5.44E-05   |
| ENSMUSG00000034108  | CCS           | -1.137770977 | 5.90E-09   |
| ENSMUSG00000033770  | CLCNKA        | -1.136654028 | 0.00012448 |

|                    |               |              |            |
|--------------------|---------------|--------------|------------|
| ENSMUSG00000020432 | TCN2          | -1.135980772 | 4.89E-05   |
| ENSMUSG00000042988 | NOTUM         | -1.13421061  | 0.00019214 |
| ENSMUSG00000024386 | PROC          | -1.134191434 | 1.09E-08   |
| ENSMUSG00000097162 | 2310010J17RIK | -1.133265986 | 0.01106279 |
| ENSMUSG00000030246 | LDHB          | -1.132602513 | 2.24E-05   |
| ENSMUSG00000025075 | HABP2         | -1.132430597 | 9.01E-06   |
| ENSMUSG00000078599 | SKINT8        | -1.130500415 | 0.01249875 |
| ENSMUSG00000028692 | AKR1A1        | -1.128413654 | 3.20E-05   |
| ENSMUSG00000021278 | AMN           | -1.124765119 | 3.70E-10   |
| ENSMUSG00000026170 | CYP27A1       | -1.121823538 | 3.68E-05   |
| ENSMUSG00000086061 | NA            | -1.12163634  | 0.00331999 |
| ENSMUSG00000034285 | NIPSNAP1      | -1.121395178 | 6.34E-08   |
| ENSMUSG00000096145 | VKORC1        | -1.121361477 | 2.95E-05   |
| ENSMUSG00000037152 | NDUFC1        | -1.120224109 | 2.74E-10   |
| ENSMUSG00000050856 | ATP5K         | -1.119428717 | 5.25E-09   |
| ENSMUSG00000097059 | NA            | -1.119421296 | 6.13E-05   |
| ENSMUSG00000019762 | IYD           | -1.119195208 | 1.24E-09   |
| ENSMUSG00000021033 | GSTZ1         | -1.116761589 | 3.81E-07   |
| ENSMUSG00000022199 | SLC22A17      | -1.116473653 | 7.95E-06   |
| ENSMUSG00000022110 | SUCLA2        | -1.116043066 | 9.74E-08   |
| ENSMUSG00000029154 | CWH43         | -1.115887377 | 7.68E-05   |
| ENSMUSG00000035578 | IQCG          | -1.115614617 | 0.00214983 |
| ENSMUSG00000079494 | CML5          | -1.11530905  | 0.00426596 |
| ENSMUSG00000022761 | LZTR1         | -1.11521759  | 5.55E-09   |
| ENSMUSG00000097318 | 1700007L15RIK | -1.114714897 | 0.01542769 |
| ENSMUSG00000027709 | MCCC1         | -1.114569666 | 9.55E-06   |
| ENSMUSG00000019763 | RMND1         | -1.113690237 | 6.96E-09   |
| ENSMUSG00000000402 | EGFL6         | -1.111356098 | 0.00219585 |
| ENSMUSG00000027452 | ACSS1         | -1.111206892 | 3.20E-06   |
| ENSMUSG00000074207 | ADH1          | -1.110699605 | 0.00055131 |
| ENSMUSG00000017639 | RAB11FIP4     | -1.109365965 | 3.03E-06   |
| ENSMUSG00000042978 | SBK1          | -1.10888634  | 0.001374   |
| ENSMUSG00000046814 | GCHFR         | -1.108566357 | 7.43E-06   |
| ENSMUSG00000037370 | ENPP1         | -1.106091269 | 4.53E-06   |
| ENSMUSG00000021947 | CRYL1         | -1.104859937 | 8.45E-06   |
| ENSMUSG00000042251 | PM20D1        | -1.104549953 | 0.00919436 |
| ENSMUSG00000024245 | TMEM178       | -1.102209104 | 1.69E-09   |
| ENSMUSG00000029359 | TESC          | -1.101483399 | 0.00015487 |
| ENSMUSG00000030861 | ACADSB        | -1.101186379 | 8.87E-09   |
| ENSMUSG00000006345 | GGT1          | -1.099794444 | 5.89E-06   |
| ENSMUSG00000039063 | ECHDC3        | -1.099657119 | 0.00029474 |
| ENSMUSG00000030869 | NDUFAB1       | -1.098889294 | 4.58E-09   |
| ENSMUSG00000028085 | PET112        | -1.097558308 | 2.51E-07   |

|                    |               |              |            |
|--------------------|---------------|--------------|------------|
| ENSMUSG00000063856 | GPX1          | -1.095084477 | 0.00021224 |
| ENSMUSG00000035232 | PDK3          | -1.09507997  | 1.82E-08   |
| ENSMUSG00000011658 | FUZ           | -1.093003186 | 5.09E-07   |
| ENSMUSG00000031791 | TMEM38A       | -1.092172044 | 3.99E-05   |
| ENSMUSG00000032314 | ETFA          | -1.089382414 | 1.32E-06   |
| ENSMUSG00000024621 | CSF1R         | -1.088073688 | 2.44E-09   |
| ENSMUSG00000022899 | SLC15A2       | -1.087819325 | 0.0001942  |
| ENSMUSG00000053644 | ALDH7A1       | -1.086071684 | 8.48E-05   |
| ENSMUSG00000025158 | RFNG          | -1.085729128 | 1.27E-07   |
| ENSMUSG00000096215 | SMIM22        | -1.085578579 | 0.00015274 |
| ENSMUSG00000024038 | NDUFV3        | -1.084719571 | 2.36E-07   |
| ENSMUSG00000038690 | ATP5J2        | -1.083716589 | 6.75E-07   |
| ENSMUSG00000022769 | SDF2L1        | -1.082929373 | 0.014434   |
| ENSMUSG00000031163 | GLOD5         | -1.082449229 | 5.77E-05   |
| ENSMUSG00000024922 | OVOL1         | -1.082091447 | 0.0005922  |
| ENSMUSG00000064359 | NA            | -1.081341626 | 0.00331404 |
| ENSMUSG00000029695 | AASS          | -1.081290822 | 0.00187652 |
| ENSMUSG00000030088 | ALDH1L1       | -1.079566509 | 9.21E-05   |
| ENSMUSG00000017390 | ALDOC         | -1.078747761 | 0.01008574 |
| ENSMUSG00000031556 | TM2D2         | -1.077976169 | 1.02E-09   |
| ENSMUSG00000017868 | SGK2          | -1.077522487 | 5.11E-05   |
| ENSMUSG00000026473 | GLUL          | -1.075548384 | 0.00017849 |
| ENSMUSG00000028470 | HINT2         | -1.075155975 | 1.99E-09   |
| ENSMUSG00000018411 | MAPT          | -1.072083447 | 2.33E-05   |
| ENSMUSG00000046338 | GPAT2         | -1.068411815 | 0.01592234 |
| ENSMUSG00000079065 | BC005561      | -1.067121223 | 8.37E-05   |
| ENSMUSG00000018474 | CHD3          | -1.066275959 | 8.76E-06   |
| ENSMUSG00000025545 | CLYBL         | -1.066013951 | 5.52E-08   |
| ENSMUSG00000036106 | PRR5          | -1.06577178  | 4.23E-05   |
| ENSMUSG00000025494 | SIGIRR        | -1.065725746 | 2.15E-08   |
| ENSMUSG00000002379 | GM4943        | -1.063258564 | 1.84E-08   |
| ENSMUSG00000024331 | DSC2          | -1.062243724 | 0.00444796 |
| ENSMUSG00000048546 | TOB2          | -1.058164072 | 1.54E-05   |
| ENSMUSG00000079470 | UTP14B        | -1.058044481 | 0.01358353 |
| ENSMUSG00000078695 | GM20267       | -1.05750579  | 6.78E-05   |
| ENSMUSG00000056055 | SAG           | -1.055542614 | 0.00929639 |
| ENSMUSG00000048232 | FBXO10        | -1.053635467 | 0.00046734 |
| ENSMUSG00000040434 | GYLTL1B       | -1.053311562 | 1.75E-05   |
| ENSMUSG00000057229 | ATP5SL        | -1.053287151 | 2.54E-10   |
| ENSMUSG00000042082 | ARSB          | -1.052304076 | 3.20E-05   |
| ENSMUSG00000024782 | AK3           | -1.05169122  | 4.36E-06   |
| ENSMUSG00000091166 | TSTD1         | -1.051600676 | 0.00092703 |
| ENSMUSG00000019689 | 1110001J03RIK | -1.051207274 | 1.94E-08   |

|                    |            |              |            |
|--------------------|------------|--------------|------------|
| ENSMUSG00000032357 | TINAG      | -1.050012187 | 4.67E-07   |
| ENSMUSG00000024713 | PCSK5      | -1.045733805 | 1.78E-05   |
| ENSMUSG00000022820 | NDUFB4     | -1.045709777 | 6.37E-08   |
| ENSMUSG00000030647 | LOC675851  | -1.042607457 | 6.84E-07   |
| ENSMUSG00000041921 | METAP1D    | -1.042380318 | 0.00130017 |
| ENSMUSG00000028463 | CAR9       | -1.040479925 | 0.01446848 |
| ENSMUSG00000015599 | TTBK1      | -1.040463366 | 0.01130362 |
| ENSMUSG00000056666 | RETSAT     | -1.040258169 | 0.00049549 |
| ENSMUSG00000026207 | SPEG       | -1.040251742 | 0.0045314  |
| ENSMUSG00000026617 | BPNT1      | -1.040134054 | 1.53E-05   |
| ENSMUSG00000029017 | PMPCB      | -1.039438757 | 2.15E-07   |
| ENSMUSG00000091509 | NA         | -1.036259214 | 0.00589384 |
| ENSMUSG00000031609 | SAP30      | -1.035620469 | 2.67E-05   |
| ENSMUSG00000045031 | CETN4      | -1.035355252 | 0.00458383 |
| ENSMUSG00000023951 | VEGFA      | -1.034174308 | 3.22E-07   |
| ENSMUSG00000042293 | GM5617     | -1.033960709 | 0.0001588  |
| ENSMUSG00000020623 | MAP2K6     | -1.032868272 | 0.00283161 |
| ENSMUSG00000071506 | TMEM139    | -1.032604391 | 0.00029877 |
| ENSMUSG00000038903 | CCDC68     | -1.032472883 | 0.00278119 |
| ENSMUSG00000033760 | RBM4B      | -1.03116309  | 2.32E-05   |
| ENSMUSG00000021376 | TPMT       | -1.031080101 | 2.27E-07   |
| ENSMUSG00000059734 | NDUFS8     | -1.030471562 | 2.30E-08   |
| ENSMUSG00000031708 | TECR       | -1.030389302 | 2.03E-07   |
| ENSMUSG00000015337 | ENDOG      | -1.02981723  | 5.83E-06   |
| ENSMUSG00000063931 | PEPD       | -1.028502864 | 1.18E-05   |
| ENSMUSG00000029545 | ACADS      | -1.023898022 | 1.97E-06   |
| ENSMUSG00000032883 | ACSL3      | -1.023890009 | 6.80E-05   |
| ENSMUSG00000022450 | NDUFA6     | -1.023356469 | 1.69E-07   |
| ENSMUSG00000002416 | NDUFB2     | -1.018981223 | 1.88E-07   |
| ENSMUSG00000058351 | SMIM4      | -1.018970158 | 2.84E-06   |
| ENSMUSG00000026664 | PHYH       | -1.018355552 | 4.51E-05   |
| ENSMUSG00000038462 | UQCRFS1    | -1.018204804 | 2.09E-06   |
| ENSMUSG00000019718 | L3HYPDH    | -1.017481981 | 1.13E-05   |
| ENSMUSG00000023243 | KCNK5      | -1.016778398 | 0.00098729 |
| ENSMUSG00000033938 | NDUFB7     | -1.016037483 | 5.91E-09   |
| ENSMUSG00000045730 | ADRB2      | -1.015864651 | 0.00047527 |
| ENSMUSG00000027679 | DNAJC19-PS | -1.015837124 | 2.90E-06   |
| ENSMUSG00000060579 | FHIT       | -1.014155434 | 0.00152714 |
| ENSMUSG00000069733 | UBE2U      | -1.013814829 | 0.00500842 |
| ENSMUSG00000020829 | SLC46A1    | -1.013077705 | 3.55E-06   |
| ENSMUSG00000059412 | FXVD2      | -1.011981134 | 0.00013179 |
| ENSMUSG00000002010 | IDH3G      | -1.011929943 | 1.70E-06   |
| ENSMUSG00000027984 | HADH       | -1.010221137 | 0.00026617 |

|                    |               |              |            |
|--------------------|---------------|--------------|------------|
| ENSMUSG00000039081 | ZFP503        | -1.0093914   | 1.02E-06   |
| ENSMUSG00000089716 | NA            | -1.007493894 | 0.0039011  |
| ENSMUSG00000045973 | SLC25A51      | -1.007286358 | 3.84E-06   |
| ENSMUSG00000052373 | MPP3          | -1.006836935 | 0.00407487 |
| ENSMUSG00000042410 | AGPS          | -1.005381857 | 2.92E-06   |
| ENSMUSG00000064366 | NA            | -1.005061894 | 0.00583974 |
| ENSMUSG00000045594 | GLB1          | -1.004770474 | 2.19E-06   |
| ENSMUSG00000032120 | C2CD2L        | -1.004537465 | 2.79E-07   |
| ENSMUSG00000019437 | TLCD1         | -1.004308353 | 2.50E-07   |
| ENSMUSG00000042198 | CHCHD7        | -1.000523612 | 4.54E-08   |
| ENSMUSG00000019872 | SMPDL3A       | -1.000268196 | 1.46E-05   |
| ENSMUSG00000028163 | NFKB1         | 1.002034446  | 2.93E-07   |
| ENSMUSG00000020230 | PRMT2         | 1.002217428  | 0.00075244 |
| ENSMUSG00000038702 | DSEL          | 1.003183888  | 0.00286517 |
| ENSMUSG00000031737 | IRX5          | 1.004049794  | 0.00687501 |
| ENSMUSG00000024998 | PLCE1         | 1.00479038   | 0.00042061 |
| ENSMUSG00000035378 | SHQ1          | 1.005011955  | 0.00039713 |
| ENSMUSG00000030281 | IL17RC        | 1.005816546  | 5.54E-07   |
| ENSMUSG00000043099 | HIC1          | 1.007525961  | 0.01826449 |
| ENSMUSG00000009585 | APOBEC3       | 1.007618418  | 0.0157118  |
| ENSMUSG00000058013 | 42258         | 1.009848514  | 7.56E-08   |
| ENSMUSG00000034708 | GRN           | 1.012424018  | 2.86E-08   |
| ENSMUSG00000037552 | PLEKHG2       | 1.012576127  | 2.32E-05   |
| ENSMUSG00000032479 | MAP4          | 1.013794772  | 4.14E-09   |
| ENSMUSG00000048537 | PHLDB1        | 1.013882859  | 3.79E-05   |
| ENSMUSG00000004032 | GSTM5         | 1.016036405  | 0.00173071 |
| ENSMUSG00000016757 | TTLL12        | 1.01874187   | 6.34E-06   |
| ENSMUSG00000079084 | CCDC82        | 1.019998616  | 0.00016456 |
| ENSMUSG00000001082 | MFSD10        | 1.020039236  | 2.53E-05   |
| ENSMUSG00000041957 | PKP2          | 1.020214324  | 5.68E-07   |
| ENSMUSG00000010154 | SPIRE2        | 1.02178042   | 0.00239968 |
| ENSMUSG00000024087 | CYP1B1        | 1.024822896  | 0.00082668 |
| ENSMUSG00000002319 | IPO4          | 1.026004912  | 1.67E-06   |
| ENSMUSG00000018398 | 42255         | 1.028541999  | 2.33E-06   |
| ENSMUSG00000028179 | CTH           | 1.029875677  | 0.00029945 |
| ENSMUSG00000035891 | CERK          | 1.033419252  | 1.39E-05   |
| ENSMUSG00000033031 | C330027C09RIK | 1.033916495  | 0.01453443 |
| ENSMUSG00000022565 | PLEC          | 1.034908618  | 3.05E-06   |
| ENSMUSG00000046718 | BST2          | 1.03512473   | 0.00460837 |
| ENSMUSG00000020089 | PPA1          | 1.035682125  | 4.35E-08   |
| ENSMUSG00000039345 | METTLL2       | 1.035993315  | 0.00072045 |
| ENSMUSG00000050737 | PTGES         | 1.03678902   | 5.96E-05   |
| ENSMUSG00000030653 | PDE2A         | 1.037274572  | 3.41E-05   |



|                     |               |             |            |
|---------------------|---------------|-------------|------------|
| ENSMUSG00000021068  | NIN           | 1.038618398 | 1.56E-05   |
| ENSMUSG00000040820  | HLCS          | 1.039801185 | 0.00012392 |
| ENSMUSG00000024660  | INCENP        | 1.039876222 | 0.0009364  |
| ENSMUSG00000079057  | CYP4V3        | 1.04024258  | 0.0004216  |
| ENSMUSG00000022360  | ATAD2         | 1.040504788 | 0.00286104 |
| ENSMUSG00000006782  | CNP           | 1.041152492 | 0.0003412  |
| ENSMUSG00000041301  | CFTR          | 1.043428927 | 0.00388549 |
| ENSMUSG00000016477  | E2F3          | 1.043619239 | 8.12E-05   |
| ENSMUSG00000058546  | GM8290        | 1.044854372 | 1.28E-06   |
| ENSMUSG00000001833  | 42254         | 1.046507123 | 3.48E-09   |
| ENSMUSG000000031785 | GPR56         | 1.04673405  | 2.48E-07   |
| ENSMUSG000000095115 | ITPRIPL2      | 1.047592338 | 1.83E-05   |
| ENSMUSG00000020325  | FSTL3         | 1.050113846 | 0.00718088 |
| ENSMUSG00000015305  | SASH1         | 1.055854528 | 7.24E-07   |
| ENSMUSG00000025154  | ARHGAP19      | 1.05714141  | 0.01325557 |
| ENSMUSG000000089762 | IER5L         | 1.058954891 | 0.0010454  |
| ENSMUSG000000051790 | NLGN2         | 1.06201228  | 0.00310709 |
| ENSMUSG000000035443 | THYN1         | 1.064739779 | 0.00112537 |
| ENSMUSG00000002885  | CD97          | 1.064770505 | 1.87E-05   |
| ENSMUSG00000004044  | PTRF          | 1.064820184 | 2.61E-06   |
| ENSMUSG00000014444  | PIEZO1        | 1.06529625  | 8.33E-09   |
| ENSMUSG00000078202  | NRARP         | 1.065753099 | 0.00350732 |
| ENSMUSG000000005103 | WDR1          | 1.066482737 | 1.38E-09   |
| ENSMUSG00000026395  | PTPRC         | 1.066660143 | 0.00061151 |
| ENSMUSG00000046056  | SBSN          | 1.067201595 | 0.01247773 |
| ENSMUSG00000068874  | SELENBP1      | 1.067932094 | 7.16E-05   |
| ENSMUSG00000000317  | BCL6B         | 1.0682203   | 0.00183297 |
| ENSMUSG00000056665  | THEM6         | 1.071702232 | 2.24E-05   |
| ENSMUSG00000015247  | NIPSNAP3B     | 1.071752918 | 1.09E-07   |
| ENSMUSG00000036882  | ARHGAP33      | 1.07212176  | 0.00756605 |
| ENSMUSG00000024542  | CEP192        | 1.072184352 | 8.14E-06   |
| ENSMUSG00000038884  | A230050P20RIK | 1.076453376 | 0.000985   |
| ENSMUSG00000063605  | CCDC102A      | 1.07661537  | 0.01500246 |
| ENSMUSG00000022948  | SETD4         | 1.077294822 | 0.00450172 |
| ENSMUSG00000039982  | DTX4          | 1.078500626 | 2.93E-06   |
| ENSMUSG00000000811  | TXNRD3        | 1.079275804 | 5.75E-05   |
| ENSMUSG00000037060  | PRKCDBP       | 1.07958037  | 0.00100311 |
| ENSMUSG00000022443  | MYH9          | 1.081043232 | 6.45E-07   |
| ENSMUSG00000007613  | TGFBR1        | 1.086760412 | 5.95E-10   |
| ENSMUSG00000008167  | FBXW9         | 1.086954111 | 5.70E-07   |
| ENSMUSG00000045658  | PID1          | 1.090330629 | 0.00334869 |
| ENSMUSG00000035397  | KLF16         | 1.090591973 | 0.00472631 |
| ENSMUSG00000027134  | LPCAT4        | 1.091316646 | 0.00018242 |

|                     |          |             |            |
|---------------------|----------|-------------|------------|
| ENSMUSG00000040263  | KLHDC4   | 1.094011711 | 7.52E-06   |
| ENSMUSG00000005447  | PAFAH1B3 | 1.094731371 | 8.13E-05   |
| ENSMUSG000000061778 | MOSPD2   | 1.09637729  | 3.76E-10   |
| ENSMUSG000000048332 | LHFP     | 1.103811598 | 0.00070418 |
| ENSMUSG000000042286 | STAB1    | 1.10469567  | 1.15E-08   |
| ENSMUSG000000040811 | EML2     | 1.107593254 | 3.00E-06   |
| ENSMUSG000000000489 | PDGFB    | 1.111165952 | 1.29E-05   |
| ENSMUSG000000027200 | SEMA6D   | 1.111429529 | 1.60E-05   |
| ENSMUSG000000046269 | USP27X   | 1.112076191 | 0.00649169 |
| ENSMUSG000000028681 | PTCH2    | 1.112954276 | 0.00707378 |
| ENSMUSG000000060519 | TOR3A    | 1.113395958 | 2.06E-06   |
| ENSMUSG000000028373 | ASTN2    | 1.113579276 | 0.01298779 |
| ENSMUSG000000028333 | ANP32B   | 1.116222929 | 5.64E-08   |
| ENSMUSG000000006442 | SRM      | 1.116295793 | 3.54E-05   |
| ENSMUSG000000025227 | TMEM180  | 1.116990081 | 1.69E-05   |
| ENSMUSG000000004383 | LARGE    | 1.11772735  | 1.91E-07   |
| ENSMUSG000000033554 | DPH5     | 1.118782458 | 4.49E-05   |
| ENSMUSG000000023886 | SMOC2    | 1.122974714 | 0.004472   |
| ENSMUSG000000027215 | CD82     | 1.126519087 | 1.54E-06   |
| ENSMUSG000000043673 | KCNS3    | 1.131251759 | 0.01449259 |
| ENSMUSG000000021213 | AKR1C13  | 1.134634986 | 0.0007209  |
| ENSMUSG000000033885 | PXK      | 1.135211389 | 2.60E-10   |
| ENSMUSG000000026674 | DDR2     | 1.139675503 | 4.09E-05   |
| ENSMUSG000000020828 | PLD2     | 1.140244958 | 2.23E-05   |
| ENSMUSG000000074971 | FIBIN    | 1.140580649 | 0.01831006 |
| ENSMUSG000000031478 | NEK3     | 1.140669871 | 0.00209049 |
| ENSMUSG000000029851 | FAM115C  | 1.141897689 | 0.00139709 |
| ENSMUSG000000022978 | MIS18A   | 1.144945834 | 0.00518631 |
| ENSMUSG000000056427 | SLIT3    | 1.145463282 | 0.00381253 |
| ENSMUSG000000050410 | TCF19    | 1.147614141 | 0.00580934 |
| ENSMUSG000000022816 | FSTL1    | 1.148803336 | 6.13E-06   |
| ENSMUSG000000020674 | PXDN     | 1.154136689 | 5.99E-07   |
| ENSMUSG000000025956 | METTL21A | 1.15633185  | 6.58E-05   |
| ENSMUSG000000026796 | FAM129B  | 1.157462893 | 2.11E-06   |
| ENSMUSG000000031367 | AP1S2    | 1.160742207 | 0.0001834  |
| ENSMUSG000000051483 | CBR1     | 1.167975381 | 1.64E-09   |
| ENSMUSG000000037892 | PCDH18   | 1.16892389  | 0.0009806  |
| ENSMUSG000000046318 | CCBE1    | 1.170410218 | 0.00076544 |
| ENSMUSG000000022265 | ANK      | 1.171652035 | 0.00154194 |
| ENSMUSG000000071041 | NA       | 1.179332864 | 0.00840181 |
| ENSMUSG000000026192 | ATIC     | 1.18817369  | 1.34E-05   |
| ENSMUSG000000040249 | LRP1     | 1.188384018 | 1.28E-05   |
| ENSMUSG000000000326 | COMT     | 1.190776695 | 2.22E-06   |

|                    |               |             |            |
|--------------------|---------------|-------------|------------|
| ENSMUSG00000031880 | RRAD          | 1.19090291  | 0.0002986  |
| ENSMUSG00000071001 | HRCT1         | 1.192321194 | 0.01433139 |
| ENSMUSG00000027322 | SIGLEC1       | 1.193218731 | 0.00735322 |
| ENSMUSG00000022748 | CMSS1         | 1.19337794  | 0.00038365 |
| ENSMUSG00000024493 | LARS          | 1.195304491 | 1.17E-11   |
| ENSMUSG00000002578 | IKZF4         | 1.196977795 | 0.00771094 |
| ENSMUSG00000032849 | ABCC4         | 1.199071763 | 2.24E-05   |
| ENSMUSG00000059883 | IRAK4         | 1.200688336 | 3.09E-06   |
| ENSMUSG00000042842 | SERPINB6B     | 1.200894463 | 2.45E-07   |
| ENSMUSG00000047528 | ALS2CR12      | 1.201724558 | 0.00114287 |
| ENSMUSG00000038963 | SLCO4A1       | 1.20241834  | 0.00229944 |
| ENSMUSG00000022325 | POP1          | 1.202499196 | 2.62E-05   |
| ENSMUSG00000039994 | TIMELESS      | 1.205247943 | 0.00010917 |
| ENSMUSG00000068566 | MYADM         | 1.208441632 | 1.70E-09   |
| ENSMUSG00000027298 | TYRO3         | 1.209178277 | 0.00098959 |
| ENSMUSG00000025348 | ITGA7         | 1.213550067 | 3.15E-07   |
| ENSMUSG00000027405 | NOP56         | 1.214298185 | 3.49E-07   |
| ENSMUSG00000023186 | VWA5A         | 1.21440227  | 1.01E-12   |
| ENSMUSG00000026574 | DPT           | 1.214741748 | 0.01446939 |
| ENSMUSG00000020101 | 4632428N05RIK | 1.215767764 | 3.55E-05   |
| ENSMUSG00000026646 | SUV39H2       | 1.221235016 | 0.0091528  |
| ENSMUSG00000028069 | GPATCH4       | 1.223396766 | 2.13E-05   |
| ENSMUSG00000041889 | SHISA4        | 1.22833166  | 2.83E-06   |
| ENSMUSG00000025510 | CD151         | 1.230875491 | 3.34E-10   |
| ENSMUSG00000039005 | TLR4          | 1.233307112 | 0.00026574 |
| ENSMUSG00000021998 | LCP1          | 1.233427168 | 6.30E-06   |
| ENSMUSG00000041592 | SDK2          | 1.233898869 | 0.00604002 |
| ENSMUSG00000022440 | C1QTNF6       | 1.234422066 | 0.0102632  |
| ENSMUSG00000050989 | SEPN1         | 1.236454862 | 2.88E-05   |
| ENSMUSG00000030782 | TGFB1I1       | 1.236952374 | 9.05E-05   |
| ENSMUSG00000021253 | TGFB3         | 1.241023808 | 0.0124288  |
| ENSMUSG00000023972 | PTK7          | 1.243475506 | 1.24E-05   |
| ENSMUSG00000041237 | PKLR          | 1.245884641 | 1.60E-06   |
| ENSMUSG00000003228 | GRK5          | 1.245954739 | 0.00015407 |
| ENSMUSG00000004891 | NES           | 1.248766466 | 3.04E-09   |
| ENSMUSG00000029201 | UGDH          | 1.249181002 | 1.31E-09   |
| ENSMUSG00000021703 | SERINC5       | 1.251831151 | 1.28E-11   |
| ENSMUSG00000042289 | HSD3B7        | 1.254199941 | 7.66E-11   |
| ENSMUSG00000031400 | G6PDX         | 1.254527208 | 2.68E-09   |
| ENSMUSG00000042349 | IKBKE         | 1.262542085 | 0.00039423 |
| ENSMUSG00000053137 | MAPK11        | 1.264161603 | 0.00010374 |
| ENSMUSG00000029761 | CALD1         | 1.265045288 | 2.49E-08   |
| ENSMUSG00000063838 | CDC42EP5      | 1.265686542 | 0.0016717  |

|                     |          |             |            |
|---------------------|----------|-------------|------------|
| ENSMUSG00000013629  | CAD      | 1.269175787 | 4.78E-06   |
| ENSMUSG00000007029  | VARS     | 1.272533322 | 1.93E-11   |
| ENSMUSG000000069920 | B3GNT9   | 1.273045726 | 0.0138126  |
| ENSMUSG000000042190 | CMKLR1   | 1.273049572 | 0.00020404 |
| ENSMUSG000000074480 | MEX3A    | 1.280230281 | 0.00459204 |
| ENSMUSG000000041741 | PDE3A    | 1.2818425   | 0.00056254 |
| ENSMUSG000000024909 | EFEMP2   | 1.285067387 | 2.34E-05   |
| ENSMUSG000000074364 | EHD2     | 1.285280099 | 3.25E-07   |
| ENSMUSG000000031562 | DCTD     | 1.2858872   | 0.01093736 |
| ENSMUSG000000029082 | BST1     | 1.288585848 | 0.00041646 |
| ENSMUSG000000031342 | GPM6B    | 1.292306975 | 1.07E-05   |
| ENSMUSG000000017446 | C1QTNF1  | 1.293567477 | 0.00103044 |
| ENSMUSG000000057722 | LEPR     | 1.293783334 | 0.00201361 |
| ENSMUSG000000029581 | FSCN1    | 1.296733024 | 0.00038898 |
| ENSMUSG000000074796 | SLC4A11  | 1.298745615 | 0.00098789 |
| ENSMUSG000000024501 | DPYSL3   | 1.301998826 | 3.75E-05   |
| ENSMUSG000000016206 | H2-M3    | 1.302291225 | 0.00110473 |
| ENSMUSG000000020080 | HKDC1    | 1.302397381 | 0.00376137 |
| ENSMUSG000000069806 | CACNG7   | 1.306367415 | 0.01326506 |
| ENSMUSG000000025366 | ESYT1    | 1.307334381 | 5.06E-09   |
| ENSMUSG000000042784 | MUC1     | 1.310574405 | 1.24E-06   |
| ENSMUSG000000002870 | MCM2     | 1.313366966 | 1.57E-05   |
| ENSMUSG000000042429 | ADORA1   | 1.313482951 | 0.00373899 |
| ENSMUSG000000050105 | GRRP1    | 1.313576733 | 0.00116257 |
| ENSMUSG000000026274 | PASK     | 1.314975097 | 0.00183384 |
| ENSMUSG000000049804 | ARMCX4   | 1.316818039 | 5.66E-05   |
| ENSMUSG000000026014 | RAPH1    | 1.317204669 | 6.67E-06   |
| ENSMUSG000000027254 | MAP1A    | 1.320117619 | 0.00688172 |
| ENSMUSG000000015709 | ARNT2    | 1.320257584 | 9.48E-13   |
| ENSMUSG000000069833 | AHNAK    | 1.321302619 | 1.98E-05   |
| ENSMUSG000000026896 | IFIH1    | 1.32280779  | 3.40E-05   |
| ENSMUSG000000045629 | SH3TC2   | 1.32304496  | 2.26E-07   |
| ENSMUSG000000000682 | CD52     | 1.325107254 | 0.00190497 |
| ENSMUSG000000031661 | NKD1     | 1.328038475 | 0.00389896 |
| ENSMUSG000000018593 | SPARC    | 1.330326962 | 3.68E-07   |
| ENSMUSG000000059552 | TRP53    | 1.330487392 | 3.95E-11   |
| ENSMUSG000000026142 | RHBDD1   | 1.340077489 | 1.58E-07   |
| ENSMUSG000000041696 | RASL12   | 1.341046116 | 0.00899899 |
| ENSMUSG000000005397 | NID1     | 1.345013668 | 4.03E-09   |
| ENSMUSG000000029700 | SLC13A1  | 1.345486405 | 4.15E-07   |
| ENSMUSG000000023224 | SERPING1 | 1.347583713 | 5.46E-05   |
| ENSMUSG000000027412 | LPIN3    | 1.347679483 | 5.85E-10   |
| ENSMUSG000000025324 | ATP10A   | 1.347793246 | 0.00152755 |

|                    |               |             |            |
|--------------------|---------------|-------------|------------|
| ENSMUSG00000007080 | POLE          | 1.351936314 | 0.00721374 |
| ENSMUSG00000013846 | ST3GAL1       | 1.352858582 | 3.87E-05   |
| ENSMUSG00000074782 | 4833422C13RIK | 1.354470138 | 0.00782009 |
| ENSMUSG00000056025 | CLCA1         | 1.355104285 | 0.00076621 |
| ENSMUSG00000015711 | PRUNE         | 1.355860501 | 2.50E-12   |
| ENSMUSG00000042029 | NCAPG2        | 1.356368592 | 0.00062313 |
| ENSMUSG00000033880 | LGALS3BP      | 1.359230469 | 5.84E-08   |
| ENSMUSG00000041362 | 4930506M07RIK | 1.366462241 | 2.92E-10   |
| ENSMUSG00000040282 | BC052040      | 1.36926608  | 0.00085953 |
| ENSMUSG00000049124 | SNRPG         | 1.374057904 | 0.00056638 |
| ENSMUSG00000024300 | MYO1F         | 1.377803148 | 0.00090852 |
| ENSMUSG00000032092 | MPZL2         | 1.381333836 | 1.17E-08   |
| ENSMUSG00000055401 | FBXO6         | 1.383358727 | 4.45E-13   |
| ENSMUSG00000031825 | CRISPLD2      | 1.386676536 | 1.81E-05   |
| ENSMUSG00000039747 | ORAI2         | 1.391414618 | 0.00077137 |
| ENSMUSG00000045827 | SERPINB9      | 1.392504335 | 7.24E-13   |
| ENSMUSG00000060594 | LAYN          | 1.392910712 | 0.00157707 |
| ENSMUSG00000016024 | LBP           | 1.399604937 | 0.00108729 |
| ENSMUSG00000073016 | UPRT          | 1.399664941 | 9.55E-05   |
| ENSMUSG00000054400 | CKLF          | 1.400365704 | 0.00405884 |
| ENSMUSG00000047557 | LXN           | 1.403379293 | 0.00015594 |
| ENSMUSG00000044811 | AF251705      | 1.404466417 | 0.01768786 |
| ENSMUSG00000020846 | FAM101B       | 1.405498311 | 1.53E-08   |
| ENSMUSG00000028464 | TPM2          | 1.406432508 | 1.50E-05   |
| ENSMUSG00000062753 | AI413582      | 1.407219609 | 3.48E-07   |
| ENSMUSG00000040945 | RCC2          | 1.419778165 | 1.46E-09   |
| ENSMUSG00000048644 | CTXN1         | 1.42159124  | 0.0017193  |
| ENSMUSG00000027230 | CREB3L1       | 1.422150738 | 8.76E-06   |
| ENSMUSG00000038729 | AKAP2         | 1.435106221 | 0.00444489 |
| ENSMUSG00000027712 | ANXA5         | 1.43541008  | 2.22E-10   |
| ENSMUSG00000054408 | SPCS3         | 1.439544872 | 2.29E-15   |
| ENSMUSG00000022488 | NCKAP1L       | 1.44104749  | 7.88E-06   |
| ENSMUSG00000021508 | CXCL14        | 1.445020997 | 2.10E-06   |
| ENSMUSG00000029999 | TGFA          | 1.445376209 | 0.0001713  |
| ENSMUSG00000064310 | ZPLD1         | 1.446298776 | 0.00032149 |
| ENSMUSG00000050944 | EFCAB5        | 1.454151494 | 0.01167438 |
| ENSMUSG00000063018 | NA            | 1.45465438  | 0.00087772 |
| ENSMUSG00000048647 | EXD1          | 1.460277076 | 0.00640125 |
| ENSMUSG00000022098 | BMP1          | 1.46075161  | 4.98E-09   |
| ENSMUSG00000030271 | OGG1          | 1.460824443 | 4.17E-08   |
| ENSMUSG00000026478 | LAMC1         | 1.461055232 | 2.04E-11   |
| ENSMUSG00000005360 | SLC1A3        | 1.467277525 | 0.0098355  |
| ENSMUSG00000031503 | COL4A2        | 1.469017603 | 1.64E-11   |

|                    |               |             |            |
|--------------------|---------------|-------------|------------|
| ENSMUSG00000067586 | S1PR3         | 1.470471329 | 2.07E-06   |
| ENSMUSG00000059791 | NRM           | 1.472352328 | 0.00397291 |
| ENSMUSG00000022912 | PROS1         | 1.474660709 | 2.18E-13   |
| ENSMUSG00000056116 | H2-T9         | 1.474993221 | 0.00255235 |
| ENSMUSG00000025196 | CPN1          | 1.475283083 | 0.00509401 |
| ENSMUSG00000048905 | 4930539E08RIK | 1.480295052 | 0.00385941 |
| ENSMUSG00000024937 | EHBP1L1       | 1.480829186 | 3.15E-08   |
| ENSMUSG00000045777 | IFITM10       | 1.503734245 | 0.00170766 |
| ENSMUSG00000036225 | KCTD1         | 1.507109834 | 2.55E-08   |
| ENSMUSG00000022665 | CCDC80        | 1.509422403 | 0.00035444 |
| ENSMUSG00000040552 | C3AR1         | 1.510781104 | 0.00252256 |
| ENSMUSG00000026249 | SERPINE2      | 1.511246724 | 3.06E-07   |
| ENSMUSG00000033373 | LOC639541     | 1.517549497 | 8.29E-08   |
| ENSMUSG00000022505 | EMP2          | 1.520354136 | 6.07E-09   |
| ENSMUSG00000092279 | 1500011B03RIK | 1.528301885 | 0.00059005 |
| ENSMUSG00000005973 | RCN1          | 1.531240431 | 3.21E-08   |
| ENSMUSG00000025492 | IFITM3        | 1.532833023 | 7.67E-07   |
| ENSMUSG00000034641 | CD300LD       | 1.535297142 | 0.0104568  |
| ENSMUSG00000042684 | NPL           | 1.536973888 | 0.00037147 |
| ENSMUSG00000033356 | PUS7L         | 1.537883328 | 0.00041653 |
| ENSMUSG00000033788 | DYSF          | 1.538038298 | 2.12E-09   |
| ENSMUSG00000032978 | GUCA2B        | 1.538121166 | 4.98E-09   |
| ENSMUSG00000097431 | NA            | 1.539243555 | 0.00052834 |
| ENSMUSG00000059714 | FLOT1         | 1.543275172 | 6.37E-14   |
| ENSMUSG00000043333 | RHBDL2        | 1.546642786 | 0.00402324 |
| ENSMUSG00000023800 | TIAM2         | 1.550672733 | 6.45E-06   |
| ENSMUSG00000024165 | HN1L          | 1.551570564 | 2.14E-17   |
| ENSMUSG00000003271 | SULT2B1       | 1.551753929 | 0.00463906 |
| ENSMUSG00000038387 | RRAS          | 1.553128381 | 3.77E-16   |
| ENSMUSG00000063160 | NUMBL         | 1.554966139 | 7.03E-07   |
| ENSMUSG00000028541 | B4GALT2       | 1.555753399 | 4.44E-05   |
| ENSMUSG00000036745 | TTLL7         | 1.556949715 | 2.19E-06   |
| ENSMUSG00000025221 | KCNIP2        | 1.558329613 | 0.00529406 |
| ENSMUSG00000032332 | COL12A1       | 1.56006204  | 2.17E-08   |
| ENSMUSG00000032271 | NNMT          | 1.563043754 | 0.00429779 |
| ENSMUSG00000025422 | AGAP2         | 1.566668124 | 0.00391634 |
| ENSMUSG00000030830 | ITGAL         | 1.575536762 | 3.60E-05   |
| ENSMUSG00000038400 | PMEPA1        | 1.576445417 | 9.20E-11   |
| ENSMUSG00000001435 | COL18A1       | 1.580620171 | 1.62E-13   |
| ENSMUSG00000036854 | HSPB6         | 1.585736875 | 2.24E-07   |
| ENSMUSG00000091243 | VGLL3         | 1.586104097 | 0.0002292  |
| ENSMUSG00000027661 | SLC2A10       | 1.58949867  | 0.01494488 |
| ENSMUSG00000057335 | CEP170        | 1.593750715 | 6.92E-07   |

|                     |               |             |            |
|---------------------|---------------|-------------|------------|
| ENSMUSG00000025271  | PFKFB1        | 1.594628276 | 0.00107416 |
| ENSMUSG00000017697  | ADA           | 1.596089764 | 0.00012036 |
| ENSMUSG00000027496  | AURKA         | 1.596443443 | 0.00892984 |
| ENSMUSG00000002602  | AXL           | 1.59958605  | 2.70E-10   |
| ENSMUSG000000032113 | CHEK1         | 1.600377075 | 0.01121476 |
| ENSMUSG00000070942  | IL1RL2        | 1.60177236  | 0.006679   |
| ENSMUSG00000029674  | LIMK1         | 1.602683714 | 2.41E-09   |
| ENSMUSG000000037440 | VNN1          | 1.606527366 | 2.09E-06   |
| ENSMUSG00000028970  | ABCB1B        | 1.611504912 | 7.87E-06   |
| ENSMUSG00000056394  | LIG1          | 1.611523708 | 4.93E-06   |
| ENSMUSG000000031875 | CMTM3         | 1.612090481 | 5.78E-07   |
| ENSMUSG000000032334 | LOXL1         | 1.615380326 | 1.57E-05   |
| ENSMUSG000000000120 | NGFR          | 1.615674317 | 0.01800738 |
| ENSMUSG000000042804 | GPR153        | 1.616932614 | 5.13E-05   |
| ENSMUSG000000006930 | HAP1          | 1.617164417 | 0.00031569 |
| ENSMUSG000000046805 | MPEG1         | 1.619093214 | 1.40E-08   |
| ENSMUSG000000058396 | GPR182        | 1.619131298 | 4.76E-07   |
| ENSMUSG000000066441 | RDH11         | 1.61970805  | 5.95E-11   |
| ENSMUSG000000034205 | LOXL2         | 1.626164636 | 7.19E-08   |
| ENSMUSG000000061048 | CDH3          | 1.639973557 | 6.23E-08   |
| ENSMUSG000000032584 | MST1R         | 1.643923374 | 0.00902424 |
| ENSMUSG000000043832 | CLEC4A3       | 1.650153633 | 0.01105185 |
| ENSMUSG000000028459 | CD72          | 1.650224885 | 0.00061114 |
| ENSMUSG000000030789 | ITGAX         | 1.652918857 | 0.00738246 |
| ENSMUSG000000047878 | A4GALT        | 1.654112858 | 6.92E-08   |
| ENSMUSG000000016262 | SERTAD4       | 1.655901422 | 0.00020372 |
| ENSMUSG000000028634 | HIVEP3        | 1.657624402 | 8.36E-05   |
| ENSMUSG000000026303 | MLPH          | 1.66052179  | 9.06E-07   |
| ENSMUSG000000097180 | 2700038G22RIK | 1.660806633 | 0.00126064 |
| ENSMUSG000000073489 | IFI204        | 1.662527299 | 0.00583573 |
| ENSMUSG000000040714 | KLC3          | 1.662627971 | 0.00105293 |
| ENSMUSG000000028980 | H6PD          | 1.664878058 | 2.04E-10   |
| ENSMUSG000000045751 | MMS22L        | 1.667675336 | 0.00010386 |
| ENSMUSG000000021127 | ZFP36L1       | 1.670087494 | 8.91E-08   |
| ENSMUSG000000039126 | PRUNE2        | 1.681496763 | 0.00290726 |
| ENSMUSG000000024691 | FAM111A       | 1.682383451 | 0.00035041 |
| ENSMUSG000000079227 | CCR5          | 1.682539878 | 5.97E-05   |
| ENSMUSG000000043895 | S1PR2         | 1.685504482 | 2.19E-06   |
| ENSMUSG000000027864 | PTGFRN        | 1.691827276 | 1.03E-09   |
| ENSMUSG000000010751 | TNFRSF22      | 1.696992639 | 0.00093088 |
| ENSMUSG000000002458 | RGS19         | 1.698585696 | 5.13E-06   |
| ENSMUSG000000002603 | TGFB1         | 1.700223298 | 3.03E-07   |
| ENSMUSG000000066607 | 6030419C18RIK | 1.70323823  | 0.00298621 |

|                    |               |             |            |
|--------------------|---------------|-------------|------------|
| ENSMUSG00000039954 | STK32A        | 1.704938304 | 8.81E-07   |
| ENSMUSG00000058099 | NFAM1         | 1.713610578 | 0.00056031 |
| ENSMUSG00000025001 | HELLS         | 1.715319994 | 0.00154841 |
| ENSMUSG00000020303 | STC2          | 1.715728694 | 0.0023983  |
| ENSMUSG00000035390 | BRSK1         | 1.715807991 | 0.00524837 |
| ENSMUSG00000046275 | TUSC5         | 1.716181096 | 0.00336768 |
| ENSMUSG00000026622 | NEK2          | 1.717557387 | 6.28E-06   |
| ENSMUSG00000025140 | PYCR1         | 1.717643227 | 0.01385525 |
| ENSMUSG00000028864 | HGF           | 1.722197609 | 9.83E-05   |
| ENSMUSG00000035783 | ACTA2         | 1.735785084 | 5.91E-06   |
| ENSMUSG00000042821 | SNAI1         | 1.736609042 | 0.00025223 |
| ENSMUSG00000028712 | CYP4A31       | 1.737180216 | 8.17E-09   |
| ENSMUSG00000030717 | NUPR1         | 1.742246197 | 6.61E-05   |
| ENSMUSG00000032269 | HTR3A         | 1.744762956 | 0.01210807 |
| ENSMUSG00000085068 | NA            | 1.750462335 | 1.95E-08   |
| ENSMUSG00000036902 | NETO2         | 1.755050307 | 0.01062525 |
| ENSMUSG00000020963 | TSHR          | 1.765499495 | 0.00172212 |
| ENSMUSG00000079017 | IFI27L2A      | 1.774616181 | 0.00920893 |
| ENSMUSG00000029163 | EMILIN1       | 1.774665621 | 6.12E-09   |
| ENSMUSG00000023004 | GM5620        | 1.782744909 | 1.08E-14   |
| ENSMUSG00000041886 | MACC1         | 1.786471153 | 0.00059185 |
| ENSMUSG00000024620 | PDGFRB        | 1.786941458 | 1.11E-10   |
| ENSMUSG00000096528 | NA            | 1.787674888 | 0.01235304 |
| ENSMUSG00000004267 | ENO2          | 1.795638005 | 9.31E-05   |
| ENSMUSG00000083992 | NA            | 1.802304243 | 0.00051005 |
| ENSMUSG00000031328 | FLNA          | 1.81938612  | 1.09E-18   |
| ENSMUSG00000040413 | TIMD2         | 1.826344107 | 8.62E-09   |
| ENSMUSG00000027204 | FBN1          | 1.839518828 | 6.16E-06   |
| ENSMUSG00000040447 | SPNS2         | 1.845389363 | 2.92E-12   |
| ENSMUSG00000033685 | UCP2          | 1.851530199 | 8.66E-13   |
| ENSMUSG00000063568 | JAZF1         | 1.856952218 | 0.00187021 |
| ENSMUSG00000005547 | CYP2A5        | 1.859510357 | 0.00138825 |
| ENSMUSG00000040212 | EMP3          | 1.863916753 | 1.35E-06   |
| ENSMUSG00000011256 | ADAM19        | 1.866677618 | 6.38E-06   |
| ENSMUSG00000056643 | CHST13        | 1.870624394 | 0.00325605 |
| ENSMUSG00000028542 | SLC6A9        | 1.873266978 | 4.30E-09   |
| ENSMUSG00000005470 | ASF1B         | 1.876403903 | 0.00564889 |
| ENSMUSG00000032744 | HEYL          | 1.877359361 | 1.40E-05   |
| ENSMUSG00000034173 | 2410018M08RIK | 1.879880737 | 0.00325164 |
| ENSMUSG00000001555 | FKBP10        | 1.880312701 | 7.30E-07   |
| ENSMUSG00000002835 | CHAF1A        | 1.88874078  | 7.27E-05   |
| ENSMUSG00000027994 | CCDC109B      | 1.892036239 | 0.01282539 |
| ENSMUSG00000036834 | PLCH1         | 1.900863078 | 1.43E-05   |



|                    |               |             |            |
|--------------------|---------------|-------------|------------|
| ENSMUSG00000073599 | ECSCR         | 1.90378451  | 3.05E-07   |
| ENSMUSG00000024677 | MS4A6B        | 1.905775309 | 6.23E-05   |
| ENSMUSG00000058152 | CHSY3         | 1.915775029 | 0.01504605 |
| ENSMUSG00000021298 | GPR132        | 1.916634283 | 0.00858593 |
| ENSMUSG00000034059 |               | 1.917662848 | 0.01342271 |
| ENSMUSG00000040618 | PCK2          | 1.92010119  | 6.34E-10   |
| ENSMUSG00000030187 | KLRA2         | 1.921496576 | 0.00342826 |
| ENSMUSG00000043017 | PTGIR         | 1.92505646  | 0.00068818 |
| ENSMUSG00000003849 | NQO1          | 1.926892443 | 1.56E-24   |
| ENSMUSG00000038742 | ANGPTL6       | 1.930108495 | 0.01250499 |
| ENSMUSG00000031497 | TNFSF13B      | 1.934712524 | 0.00407366 |
| ENSMUSG00000001525 | TUBB5         | 1.955678687 | 5.46E-16   |
| ENSMUSG00000028262 | CLCA2         | 1.957201664 | 0.00106512 |
| ENSMUSG00000038578 | SUSD1         | 1.961003523 | 2.18E-10   |
| ENSMUSG00000031861 | LPAR2         | 1.978083257 | 9.24E-08   |
| ENSMUSG00000074398 | GM15441       | 1.982434502 | 0.00012534 |
| ENSMUSG00000074415 | 2610203C20RIK | 1.98275009  | 0.00031047 |
| ENSMUSG00000020672 | SNTG2         | 2.00060971  | 0.00053805 |
| ENSMUSG00000055254 | NTRK2         | 2.014248075 | 0.00692374 |
| ENSMUSG00000030641 | 4632434I11RIK | 2.045714996 | 0.00033845 |
| ENSMUSG00000023000 | DHH           | 2.06121102  | 0.0014228  |
| ENSMUSG00000029868 | TRPV6         | 2.074488246 | 1.25E-05   |
| ENSMUSG00000031934 | PANX1         | 2.07673124  | 4.53E-05   |
| ENSMUSG00000028076 | CD1D1         | 2.089418572 | 4.06E-05   |
| ENSMUSG00000069516 | LYZ2          | 2.093589764 | 1.51E-08   |
| ENSMUSG00000028370 | PAPPA         | 2.09637053  | 8.03E-09   |
| ENSMUSG00000028327 | 1300002K09RIK | 2.099456025 | 3.99E-11   |
| ENSMUSG00000062480 | ACAT3         | 2.114522255 | 1.21E-09   |
| ENSMUSG00000054146 | KRT15         | 2.153741763 | 0.00053816 |
| ENSMUSG00000084416 | NA            | 2.153743421 | 0.00117784 |
| ENSMUSG00000060487 | SAMD5         | 2.159423908 | 2.16E-06   |
| ENSMUSG00000036545 | ADAMTS2       | 2.162991056 | 8.92E-08   |
| ENSMUSG00000032085 | TAGLN         | 2.171511597 | 6.97E-15   |
| ENSMUSG00000043263 |               | 2.178219751 | 0.00390905 |
| ENSMUSG00000041481 | NA            | 2.205653929 | 0.00130348 |
| ENSMUSG00000063011 | MSLN          | 2.211165131 | 0.00069491 |
| ENSMUSG00000013698 | PEA15A        | 2.212788842 | 2.77E-19   |
| ENSMUSG00000037946 | FGD3          | 2.218257711 | 1.74E-06   |
| ENSMUSG00000020865 | ABCC3         | 2.226955063 | 2.01E-07   |
| ENSMUSG00000054675 | TMEM119       | 2.232304149 | 2.58E-10   |
| ENSMUSG00000068196 | COL8A1        | 2.256754574 | 9.94E-16   |
| ENSMUSG00000025064 |               | 2.268785907 | 0.00803515 |
| ENSMUSG00000004098 | COL5A3        | 2.280531532 | 1.79E-05   |

|                     |           |             |            |
|---------------------|-----------|-------------|------------|
| ENSMUSG00000031821  | GINS2     | 2.299943317 | 4.55E-07   |
| ENSMUSG00000015947  | FCGR1     | 2.30224276  | 0.00014229 |
| ENSMUSG00000005124  | WISP1     | 2.318561132 | 5.18E-07   |
| ENSMUSG000000055612 | CDCA7     | 2.318918115 | 8.96E-05   |
| ENSMUSG000000023908 | PKMYT1    | 2.331391801 | 9.69E-06   |
| ENSMUSG000000031297 | SLC7A3    | 2.334421697 | 0.00336481 |
| ENSMUSG000000044827 | TLR1      | 2.350778057 | 7.26E-05   |
| ENSMUSG00000013338  | FER1L4    | 2.356935675 | 0.01012219 |
| ENSMUSG000000053279 | ALDH1A1   | 2.379450979 | 7.15E-09   |
| ENSMUSG000000029819 | NPY       | 2.412030043 | 0.01048909 |
| ENSMUSG000000030474 | SIGLECE   | 2.424749843 | 0.00029204 |
| ENSMUSG000000046245 | PILRA     | 2.446106818 | 7.53E-05   |
| ENSMUSG000000026536 |           | 2.448168176 | 0.00175692 |
| ENSMUSG000000003617 | CP        | 2.486764332 | 5.62E-21   |
| ENSMUSG000000035274 | TPBG      | 2.48899061  | 1.82E-06   |
| ENSMUSG000000029096 | HTRA3     | 2.495821566 | 0.00011628 |
| ENSMUSG000000024747 | ALDH1A7   | 2.536670631 | 6.81E-09   |
| ENSMUSG000000072494 | PPP1R3E   | 2.54051763  | 1.51E-09   |
| ENSMUSG000000006219 | FBLIM1    | 2.540810853 | 7.46E-19   |
| ENSMUSG000000074676 | FOXS1     | 2.54555975  | 0.0001515  |
| ENSMUSG000000037474 | DTL       | 2.549954777 | 0.00801997 |
| ENSMUSG000000020712 | TCAM1     | 2.552027304 | 0.0092491  |
| ENSMUSG000000008540 | MGST1     | 2.617059054 | 5.79E-33   |
| ENSMUSG000000029778 | ADCYAP1R1 | 2.630949224 | 2.98E-06   |
| ENSMUSG000000024672 | MS4A7     | 2.631414971 | 6.20E-05   |
| ENSMUSG000000050069 | GREM2     | 2.64002274  | 0.00070473 |
| ENSMUSG000000031379 | PIR       | 2.642130089 | 4.93E-05   |
| ENSMUSG000000030895 | HPX       | 2.682377646 | 0.00081583 |
| ENSMUSG000000047497 | ADAMTS12  | 2.691938222 | 9.34E-06   |
| ENSMUSG000000021999 | CPB2      | 2.701797993 | 0.00012055 |
| ENSMUSG000000035910 | DCDC2A    | 2.730840318 | 9.16E-16   |
| ENSMUSG000000066861 |           | 2.746928647 | 0.00432418 |
| ENSMUSG000000021611 | TERT      | 2.753162435 | 4.15E-07   |
| ENSMUSG000000031803 |           | 2.77162459  | 0.00258535 |
| ENSMUSG000000034528 | HSD17B13  | 2.779570381 | 0.00774495 |
| ENSMUSG000000034040 | WBSCR17   | 2.791475774 | 0.0007338  |
| ENSMUSG000000031098 | SYT8      | 2.796368474 | 0.00106909 |
| ENSMUSG000000006014 | PRG4      | 2.811968729 | 4.97E-05   |
| ENSMUSG000000030546 | PLIN1     | 2.831058742 | 0.00488004 |
| ENSMUSG000000036422 | PCDH8     | 2.84659298  | 0.00152092 |
| ENSMUSG000000064637 | NA        | 2.878302001 | 0.00068932 |
| ENSMUSG000000027750 | POSTN     | 2.883438874 | 7.74E-09   |
| ENSMUSG000000023992 | TREM2     | 2.953483375 | 0.00390463 |

|                     |               |             |            |
|---------------------|---------------|-------------|------------|
| ENSMUSG00000054422  | FABP1         | 2.976479483 | 0.00282928 |
| ENSMUSG00000086481  | NA            | 3.007390197 | 0.00034732 |
| ENSMUSG00000027797  | DCLK1         | 3.030423841 | 2.62E-06   |
| ENSMUSG00000040133  | GPR176        | 3.106847128 | 4.15E-07   |
| ENSMUSG00000006638  | ABHD1         | 3.221262446 | 0.00014378 |
| ENSMUSG00000006642  | TCF23         | 3.243466736 | 5.98E-06   |
| ENSMUSG000000061780 | CFD           | 3.268216386 | 0.01288532 |
| ENSMUSG00000033576  | APOL6         | 3.283436667 | 0.00087855 |
| ENSMUSG00000075408  | NA            | 3.352936261 | 0.00645614 |
| ENSMUSG00000043705  | CAPN13        | 3.36643866  | 3.25E-05   |
| ENSMUSG00000035455  | FIGNL1        | 3.405900519 | 3.70E-05   |
| ENSMUSG00000019848  | POPDC3        | 3.41303859  | 0.00122144 |
| ENSMUSG00000047109  | CLDN14        | 3.448786776 | 0.00017524 |
| ENSMUSG00000030762  | AQP8          | 3.510772473 | 0.00016977 |
| ENSMUSG00000012705  | RETN          | 3.55550908  | 0.00132889 |
| ENSMUSG00000053687  | DPEP2         | 3.636990344 | 2.63E-07   |
| ENSMUSG00000022144  |               | 3.710243954 | 0.00136492 |
| ENSMUSG00000096255  | DYNLT1A       | 3.859016549 | 9.20E-06   |
| ENSMUSG00000040017  | SAA4          | 4.038114382 | 0.00017391 |
| ENSMUSG00000059201  | LEP           | 4.056850899 | 0.00058189 |
| ENSMUSG00000052353  | 9930013L23RIK | 4.07326862  | 8.83E-08   |
| ENSMUSG00000076612  | NA            | 4.090666065 | 0.00131461 |
| ENSMUSG00000031271  | SERPINA7      | 4.161598374 | 1.70E-06   |
| ENSMUSG00000027875  | HMGCS2        | 4.163088904 | 5.44E-24   |
| ENSMUSG00000046623  | GJB4          | 4.208708746 | 1.29E-12   |
| ENSMUSG00000076614  | NA            | 4.250821539 | 0.00289425 |
| ENSMUSG000000061947 | SERPINA10     | 4.371339314 | 3.69E-20   |
| ENSMUSG00000042367  | GJB3          | 4.416910923 | 7.90E-08   |
| ENSMUSG00000022548  | APOD          | 4.463494222 | 4.40E-05   |
| ENSMUSG00000045545  | KRT14         | 4.493639306 | 3.82E-07   |
| ENSMUSG00000022780  | MF12          | 4.532404483 | 2.20E-05   |
| ENSMUSG00000074280  | NA            | 4.537037002 | 0.00284422 |
| ENSMUSG00000058216  | BC021614      | 4.542938441 | 4.07E-06   |
| ENSMUSG00000090634  | NA            | 4.700299326 | 2.20E-05   |
| ENSMUSG00000076555  | NA            | 5.016313826 | 0.00733109 |
| ENSMUSG00000048087  | AHCY          | 5.253305442 | 8.55E-09   |
| ENSMUSG00000093954  | GM21464       | 5.622717719 | 2.51E-05   |
| ENSMUSG00000074934  | GREM1         | 5.826451943 | 8.62E-07   |
| ENSMUSG00000026390  | MARCO         | 6.852340093 | 0.00018592 |
| ENSMUSG00000097848  | NA            | 6.981725079 | 8.18E-07   |
| ENSMUSG00000057465  |               | 7.33779796  | 3.48E-08   |
| ENSMUSG00000018623  | MMP7          | 7.613106169 | 8.29E-07   |
| ENSMUSG00000082935  | NA            | 7.747859945 | 4.51E-05   |
